# Supplementary material for: Short-term improvement of heat tolerance in naturally growing Acropora corals in Okinawa
Source: PeerJ. 2023 Jan 5;11:e14629. doi: 10.7717/peerj.14629 (PMC9826613; doi:10.7717/peerj.14629)
Supplement: Supplemental Information 2 [file peerj-11-14629-s002.xlsx]

## Sheet: AcroporaData
					Bleaching Status		Projected Area (cm2)			Whole Mortality Status		Partial Mortality Status
Subsite	Quadrat	Colony_id	Species	Species_2	2016 (Sep)	2017 (Sep)	2016 (Apr)	2017 (Apr)	2018 (May)	t1	t2	t1	t2
1	1	1	A. gemmifera	A. gemmifera	CB	D	43.2	D	D	1	remove	D	D
1	1	2	A. gemmifera	A. gemmifera	CB	D	13.6	D	D	1	remove	D	D
1	1	3	Others	Unknow	UB	PB	3	3.663	10.379	0	0	0	0
1	1	4	Others	A. nasuta	CB	D	713.7	D	D	1	remove	D	D
1	1	5	Tabular	A. hyacinthus	CB	D	123	D	D	1	remove	D	D
1	1	6	Others	A. monticulosa	CB	D	616.9	D	D	1	remove	D	D
1	1	7	Others	A. monticulosa	CB	D	69.3	D	D	1	remove	D	D
1	1	9	Others	A. monticulosa	CB	cd	792.5	D	D	1	remove	D	D
1	1	10	A. digitifera	A. digitifera	CB	D	51	D	D	1	remove	D	D
1	1	11	Tabular	A. cytherea	CB	PB	639.3	689.503	D	0	1	D	D
1	1	12	Tabular	A. hyacinthus	PB	CB	213.1	0.98	D	0	1	D	D
1	1	13	A. gemmifera	A. gemmifera	CB	CB	28.9	cd	9.056	0	0	1	0
1	1	14	A. digitifera	A. digitifera	CB	PB	73.4	110.933	174.42	0	0	0	0
1	1	15	Others	A. latistella	CB	PB	182.8	66.647	D	0	1	D	D
1	1	16	A. gemmifera	A. gemmifera	CB	D	20	D	D	1	remove	D	D
1	1	17	A. gemmifera	A. gemmifera	CB	D	69.5	D	D	1	remove	D	D
1	1	18	A. gemmifera	A. gemmifera	CB	D	274.8	D	D	1	remove	D	D
1	1	19	A. digitifera	A. digitifera	CB	D	91	D	D	1	remove	D	D
1	1	20	A. digitifera	A. digitifera	CB	D	11.7	30.019	D	0	1	D	D
1	1	21	A. gemmifera	A. gemmifera	CB	D	224.7	D	D	1	remove	D	D
1	1	22	A. gemmifera	A. gemmifera	CB	D	203.8	D	D	1	remove	D	D
1	2	23	A. digitifera	A. digitifera	CB	PB	60.6	60.469	93.967	0	0	1	0
1	2	25	Tabular	A. hyacinthus	CB	UB	21.7	95.788	243.352	0	0	0	0
1	2	30	Others	A. valida	CB	PB	58.3	29.916	55.066	0	0	1	0
1	2	31	Others	A. valida	CB	PB	109.4	14.097	2.396	0	0	1	1
1	2	32	Tabular	A. hyacinthus	CB	PB	44.8	46.858	77.832	0	0	0	0
1	2	37	Tabular	A. cytherea	PB	PB	8821.2	6261.06	7532.31	0	0	1	1
1	2	38	Tabular	A. hyacinthus	PB	D	25.8	D	D	1	remove	D	D
1	2	40	A. digitifera	A. digitifera	CB	PB	28.2	41.615	68.194	0	0	0	0
1	2	41	Tabular	A. cytherea	CB	D	123.7	D	D	1	remove	D	D
1	2	42	Others	A. humilis	CB	CB	184.8	3.736	24.904	0	0	1	1
1	2	43	Tabular	A. cytherea	CB	PB	1441.9	1296.26	1252.3	0	0	1	1
1	2	44	Others	A. monticulosa	CB	PB	464.2	65.433	148.653	0	0	1	1
1	2	46	A. digitifera	A. digitifera	CB	PB	131.7	93.222	119.352	0	0	1	0
1	2	47	A. digitifera	A. digitifera	CB	cd	239.2	85.444	137.793	0	0	1	1
1	2	49	A. gemmifera	A. gemmifera	CB	D	208.9	D	D	1	remove	D	D
1	2	51	A. gemmifera	A. gemmifera	CB	PB	55.8	0.527	4.701	0	0	1	1
1	2	52	A. digitifera	A. digitifera	CB	PB	26.1	9.471	20.742	0	0	1	0
1	2	54	Tabular	A. cytherea	PB	PB	25.4	24.086	121.384	0	0	1	0
1	2	56	A. gemmifera	A. gemmifera	CB	cd	1069.5	4.393	22.427	0	0	1	1
1	2	58	A. gemmifera	A. gemmifera	PB	UB	214.6	96.207	156.984	0	0	1	0
1	2	59	A. gemmifera	A. gemmifera	CB	PB	1055.4	664.734	967.847	0	0	1	1
2	3	60	A. gemmifera	A. gemmifera	CB	D	571.4	26.308	D	0	1	D	D
2	3	60.1	Others	A. nobilis	PB	PB	11.3	43.575	88.93	0	0	0	0
2	3	61	A. gemmifera	A. gemmifera	CB	D	114.9	D	D	1	remove	D	D
2	3	64	Others	A. nasuta	CB	D	48.9	50.365	D	0	1	D	D
2	3	66	A. gemmifera	A. gemmifera	CB	D	351.2	D	D	1	remove	D	D
2	3	66.1	A. gemmifera	A. gemmifera	CB	PB	21.8	cd	21.004	0	0	0	0
2	3	67	A. digitifera	A. digitifera	CB	CB	97.6	25.906	41.829	0	0	1	1
2	3	68	A. digitifera	A. digitifera	CB	CB	107.9	104.849	129.008	0	0	1	0
2	3	69	A. gemmifera	A. gemmifera	CB	D	289.5	D	D	1	remove	D	D
2	3	70	A. gemmifera	A. gemmifera	CB	D	526.4	D	D	1	remove	D	D
2	3	71	Tabular	A. hyacinthus	CB	D	32.9	47.645	D	0	1	D	D
2	3	71.1	A. digitifera	A. digitifera	CB	UB	20.8	13.03	D	0	1	D	D
2	3	72	A. digitifera	A. digitifera	CB	cd	39.2	28.048	6.702	0	0	1	1
2	3	73	A. digitifera	A. digitifera	CB	D	172.1	184.323	D	0	1	D	D
2	3	73.1	A. digitifera	A. digitifera	CB	D	28.5	D	D	1	remove	D	D
2	3	73.3	Others	A. nobilis	CB	PB	34.9	24.49	19.657	0	0	1	1
2	3	74	Others	A. nobilis	CB	PB	27.3	2.789	10.221	0	0	1	1
2	3	75	Tabular	A. cytherea	CB	D	193.6	228.348	D	0	1	D	D
2	3	76.1	A. digitifera	A. digitifera	CB	PB	38.2	67.704	124.833	0	0	0	0
2	3	77	A. gemmifera	A. gemmifera	CB	D	479.5	2.483	D	0	1	D	D
2	3	78	A. gemmifera	A. gemmifera	CB	PB	159.7	169.693	D	0	1	D	D
2	3	79	A. gemmifera	A. gemmifera	CB	D	311.5	D	D	1	remove	D	D
2	3	80	A. gemmifera	A. gemmifera	CB	D	67	D	D	1	remove	D	D
2	3	81	Others	A. monticulosa	CB	D	39.9	D	D	1	remove	D	D
2	3	82	A. gemmifera	A. gemmifera	CB	D	220.3	D	D	1	remove	D	D
2	3	83	A. digitifera	A. digitifera	CB	PB	16.7	22.651	3.718	0	0	0	1
2	3	84	Others	A. valida	CB	PB	27.3	12.74	cd	0	cd	D	D
2	3	85	A. gemmifera	A. gemmifera	CB	cd	92.6	112.221	7.571	0	0	0	1
2	3	86	A. digitifera	A. digitifera	CB	PB	91	92.318	22.778	0	0	0	1
2	3	87	A. gemmifera	A. gemmifera	CB	D	352.5	D	D	1	remove	D	D
2	3	88	A. digitifera	A. digitifera	CB	PB	17.1	22.831	37.328	0	0	0	0
2	3	89	A. digitifera	A. digitifera	CB	D	51.4	D	D	1	remove	D	D
2	3	91	A. gemmifera	A. gemmifera	CB	D	30.2	D	D	1	remove	D	D
2	3	92	Others	A. monticulosa	CB	CB	862.8	820.143	252.926	0	0	1	1
2	3	93	Others	A. humilis	CB	D	49.8	D	D	1	remove	D	D
2	3	94	A. gemmifera	A. gemmifera	CB	CB	131.7	41.98	D	0	1	D	D
2	3	95	A. gemmifera	A. gemmifera	CB	D	612.5	D	D	1	remove	D	D
2	3	96	A. digitifera	A. digitifera	CB	PB	79.1	88.92	167.42	0	0	0	0
2	3	99	A. gemmifera	A. gemmifera	CB	D	279.7	D	D	1	remove	D	D
2	3	100	A. gemmifera	A. gemmifera	CB	D	126.1	D	D	1	remove	D	D
2	3	101	A. gemmifera	A. gemmifera	CB	D	521.4	D	D	1	remove	D	D
2	4	102	A. gemmifera	A. gemmifera	CB	PB	160.2	34.428	131.991	0	0	1	1
2	4	103	Tabular	A. cytherea	CB	D	130	D	D	1	remove	D	D
2	4	104	A. gemmifera	A. gemmifera	CB	D	840.9	D	D	1	remove	D	D
2	4	105	A. digitifera	A. digitifera	CB	UB	35.3	16.877	26.017	0	0	1	0
2	4	106	A. digitifera	A. digitifera	CB	PB	161.1	142.591	121.595	0	0	1	1
2	4	108	A. digitifera	A. digitifera	CB	PB	207.8	155.472	23.461	0	0	1	1
2	4	109	A. gemmifera	A. gemmifera	CB	D	229.2	D	D	1	remove	D	D
2	4	110	A. digitifera	A. digitifera	CB	PB	17.9	26.85	49.36	0	0	0	0
2	4	110.1	Tabular	A. cytherea	CB	UB	7.2	15.009	27.319	0	0	0	0
2	4	110.2	A. digitifera	A. digitifera	CB	UB	10.5	5.148	D	0	1	D	D
2	4	111	Others	A. monticulosa	CB	PB	1444.6	289.444	372.507	0	0	1	1
2	4	111.1	Tabular	A. cytherea	CB	UB	11	18.602	28.097	0	0	0	0
2	4	112	A. digitifera	A. digitifera	CB	PB	82.8	109.068	180.826	0	0	0	0
2	4	113	A. digitifera	A. digitifera	CB	D	24.6	D	D	1	remove	D	D
2	4	115	Others	A. nobilis	CB	cd	63.8	8.863	D	0	1	D	D
2	4	116	Others	A. nasuta	CB	D	169.2	D	D	1	remove	D	D
2	4	117	A. gemmifera	A. gemmifera	CB	PB	48.2	78.806	94.959	0	0	0	0
2	4	118	A. digitifera	A. digitifera	CB	CB	561.9	633.597	586.193	0	0	0	1
2	4	121	A. digitifera	A. digitifera	CB	PB	78.1	18.602	103.306	0	0	1	0
2	4	122	A. digitifera	A. digitifera	CB	D	31.4	D	D	1	remove	D	D
2	4	123	Tabular	A. cytherea	CB	D	3610.5	D	D	1	remove	D	D
2	4	126	A. digitifera	A. digitifera	CB	D	17.3	D	D	1	remove	D	D
2	4	127	A. digitifera	A. digitifera	CB	D	117.9	D	D	1	remove	D	D
2	4	128	Others	A. nobilis	CB	PB	108.2	cd	69.639	0	0	1	0
2	4	129	Others	A. nobilis	CB	PB	314	18.21	cd	0	0	1	1
2	4	130	A. digitifera	A. digitifera	CB	PB	109	157.628	195.949	0	0	0	0
2	4	131	Others	A. aspera	CB	CB	254.6	181.031	7.058	0	0	1	1
2	4	132	Others	A. nasuta	CB	D	526.7	D	D	1	remove	D	D
2	4	133	A. digitifera	A. digitifera	CB	PB	36.5	105.272	105.932	0	0	0	0
2	4	134	Tabular	A. cytherea	PB	D	52.6	81.706	D	0	1	D	D
2	4	135	A. gemmifera	A. gemmifera	CB	PB	43.2	36.469	7.806	0	0	1	1
2	4	136	A. gemmifera	A. gemmifera	CB	D	185.1	11.024	D	0	1	D	D
2	4	137	A. gemmifera	A. gemmifera	CB	CB	79	23.481	34.154	0	0	1	0
2	4	138	A. digitifera	A. digitifera	PB	PB	106.3	140.49	150.235	0	0	0	0
2	4	139	A. gemmifera	A. gemmifera	CB	CB	479.9	4.77	12.113	0	0	1	1
2	4	140	Others	A. robusta	CB	PB	541.9	37.463	105.334	0	0	1	1
2	4	141	A. digitifera	A. digitifera	CB	D	104.5	D	D	1	remove	D	D
2	4	143	A. digitifera	A. digitifera	CB	D	292.5	D	D	1	remove	D	D
2	4	144	A. digitifera	A. digitifera	CB	PB	212.2	183.04	259.132	0	0	1	0

## Sheet: AcroporaData-summary
	Coloumn	Coloumn	Data Type	Levels	Remarks	Remarks-2
		Subsite	Factor	1
				2
		Quadrat	Factor	1
				2
				3
				4
		Colony Id	Character
		Species	Factor	A. gemmifera	Species names used for analyses
				A. digitifera
				Tabular
				Others
		Species_2	Character		All species name
	Bleaching Status	2016 (Sep)	Factor	CB	Completely Bleached
				PB	Partially Bleached
				UB	Unbleached
		2017 (Sep)	Factor	CB	Completely Bleached
				PB	Partially Bleached
				N	Unbleached
				D	Dead	Removed from the analyses
				cd	alive, but could not detect the bleaching status	Removed from the analyses
	Projected Area (cm2)	2016 (Apr)	Numeric		Colonies that died are denoted by D	Used for estimating growth and confirming the partial mortality status of colonies
		2017 (Apr)	Numeric
		2018 (May)	Numeric
	Whole Mortality Status	t1	Factor	0	Alive
				1	Dead
		t2	Factor	0	Alive
				1	Dead
				remove	Died in previous time period-t1	Removed from the analyses
	Partial Mortality Status	t1	Factor	0	Partial mortality observed
				1	No partial mortality observed
				D	Dead	Removed from the analyses
		t2	Factor		Same as t1

## Sheet: Temperature
Date_Time	Date	Hours	Temperature (C)	Year	Month	Week
4/14/2016 11:00	2016-04-14	11:00:00	23.28	2016	4	15
4/14/2016 12:00	2016-04-14	12:00:00	23.256	2016	4	15
4/14/2016 13:00	2016-04-14	13:00:00	23.256	2016	4	15
4/14/2016 14:00	2016-04-14	14:00:00	23.112	2016	4	15
4/14/2016 15:00	2016-04-14	15:00:00	23.088	2016	4	15
4/14/2016 16:00	2016-04-14	16:00:00	23.136	2016	4	15
4/14/2016 17:00	2016-04-14	17:00:00	23.04	2016	4	15
4/14/2016 18:00	2016-04-14	18:00:00	23.112	2016	4	15
4/14/2016 19:00	2016-04-14	19:00:00	22.92	2016	4	15
4/14/2016 20:00	2016-04-14	20:00:00	22.896	2016	4	15
4/14/2016 21:00	2016-04-14	21:00:00	22.872	2016	4	15
4/14/2016 22:00	2016-04-14	22:00:00	22.729	2016	4	15
4/14/2016 23:00	2016-04-14	23:00:00	22.729	2016	4	15
4/15/2016 0:00	2016-04-15	00:00:00	22.753	2016	4	15
4/15/2016 1:00	2016-04-15	01:00:00	22.753	2016	4	15
4/15/2016 2:00	2016-04-15	02:00:00	22.633	2016	4	15
4/15/2016 3:00	2016-04-15	03:00:00	22.561	2016	4	15
4/15/2016 4:00	2016-04-15	04:00:00	22.465	2016	4	15
4/15/2016 5:00	2016-04-15	05:00:00	22.417	2016	4	15
4/15/2016 6:00	2016-04-15	06:00:00	22.417	2016	4	15
4/15/2016 7:00	2016-04-15	07:00:00	22.393	2016	4	15
4/15/2016 8:00	2016-04-15	08:00:00	22.369	2016	4	15
4/15/2016 9:00	2016-04-15	09:00:00	22.489	2016	4	15
4/15/2016 10:00	2016-04-15	10:00:00	22.776	2016	4	15
4/15/2016 11:00	2016-04-15	11:00:00	22.968	2016	4	15
4/15/2016 12:00	2016-04-15	12:00:00	23.208	2016	4	15
4/15/2016 13:00	2016-04-15	13:00:00	23.448	2016	4	15
4/15/2016 14:00	2016-04-15	14:00:00	23.4	2016	4	15
4/15/2016 15:00	2016-04-15	15:00:00	23.713	2016	4	15
4/15/2016 16:00	2016-04-15	16:00:00	23.713	2016	4	15
4/15/2016 17:00	2016-04-15	17:00:00	23.641	2016	4	15
4/15/2016 18:00	2016-04-15	18:00:00	23.593	2016	4	15
4/15/2016 19:00	2016-04-15	19:00:00	23.545	2016	4	15
4/15/2016 20:00	2016-04-15	20:00:00	23.448	2016	4	15
4/15/2016 21:00	2016-04-15	21:00:00	23.232	2016	4	15
4/15/2016 22:00	2016-04-15	22:00:00	23.112	2016	4	15
4/15/2016 23:00	2016-04-15	23:00:00	22.992	2016	4	15
4/16/2016 0:00	2016-04-16	00:00:00	22.944	2016	4	15
4/16/2016 1:00	2016-04-16	01:00:00	22.824	2016	4	15
4/16/2016 2:00	2016-04-16	02:00:00	22.824	2016	4	15
4/16/2016 3:00	2016-04-16	03:00:00	22.681	2016	4	15
4/16/2016 4:00	2016-04-16	04:00:00	22.729	2016	4	15
4/16/2016 5:00	2016-04-16	05:00:00	22.753	2016	4	15
4/16/2016 6:00	2016-04-16	06:00:00	22.681	2016	4	15
4/16/2016 7:00	2016-04-16	07:00:00	22.633	2016	4	15
4/16/2016 8:00	2016-04-16	08:00:00	22.609	2016	4	15
4/16/2016 9:00	2016-04-16	09:00:00	22.609	2016	4	15
4/16/2016 10:00	2016-04-16	10:00:00	22.657	2016	4	15
4/16/2016 11:00	2016-04-16	11:00:00	22.705	2016	4	15
4/16/2016 12:00	2016-04-16	12:00:00	22.968	2016	4	15
4/16/2016 13:00	2016-04-16	13:00:00	23.088	2016	4	15
4/16/2016 14:00	2016-04-16	14:00:00	23.136	2016	4	15
4/16/2016 15:00	2016-04-16	15:00:00	23.16	2016	4	15
4/16/2016 16:00	2016-04-16	16:00:00	23.088	2016	4	15
4/16/2016 17:00	2016-04-16	17:00:00	23.064	2016	4	15
4/16/2016 18:00	2016-04-16	18:00:00	22.992	2016	4	15
4/16/2016 19:00	2016-04-16	19:00:00	22.944	2016	4	15
4/16/2016 20:00	2016-04-16	20:00:00	22.848	2016	4	15
4/16/2016 21:00	2016-04-16	21:00:00	22.753	2016	4	15
4/16/2016 22:00	2016-04-16	22:00:00	22.705	2016	4	15
4/16/2016 23:00	2016-04-16	23:00:00	22.681	2016	4	15
4/17/2016 0:00	2016-04-17	00:00:00	22.657	2016	4	16
4/17/2016 1:00	2016-04-17	01:00:00	22.657	2016	4	16
4/17/2016 2:00	2016-04-17	02:00:00	22.657	2016	4	16
4/17/2016 3:00	2016-04-17	03:00:00	22.657	2016	4	16
4/17/2016 4:00	2016-04-17	04:00:00	22.657	2016	4	16
4/17/2016 5:00	2016-04-17	05:00:00	22.681	2016	4	16
4/17/2016 6:00	2016-04-17	06:00:00	22.681	2016	4	16
4/17/2016 7:00	2016-04-17	07:00:00	22.681	2016	4	16
4/17/2016 8:00	2016-04-17	08:00:00	22.705	2016	4	16
4/17/2016 9:00	2016-04-17	09:00:00	22.8	2016	4	16
4/17/2016 10:00	2016-04-17	10:00:00	23.016	2016	4	16
4/17/2016 11:00	2016-04-17	11:00:00	23.208	2016	4	16
4/17/2016 12:00	2016-04-17	12:00:00	23.545	2016	4	16
4/17/2016 13:00	2016-04-17	13:00:00	23.689	2016	4	16
4/17/2016 14:00	2016-04-17	14:00:00	23.617	2016	4	16
4/17/2016 15:00	2016-04-17	15:00:00	23.545	2016	4	16
4/17/2016 16:00	2016-04-17	16:00:00	23.761	2016	4	16
4/17/2016 17:00	2016-04-17	17:00:00	23.593	2016	4	16
4/17/2016 18:00	2016-04-17	18:00:00	23.617	2016	4	16
4/17/2016 19:00	2016-04-17	19:00:00	23.545	2016	4	16
4/17/2016 20:00	2016-04-17	20:00:00	23.448	2016	4	16
4/17/2016 21:00	2016-04-17	21:00:00	23.352	2016	4	16
4/17/2016 22:00	2016-04-17	22:00:00	23.112	2016	4	16
4/17/2016 23:00	2016-04-17	23:00:00	22.92	2016	4	16
4/18/2016 0:00	2016-04-18	00:00:00	22.776	2016	4	16
4/18/2016 1:00	2016-04-18	01:00:00	22.633	2016	4	16
4/18/2016 2:00	2016-04-18	02:00:00	22.681	2016	4	16
4/18/2016 3:00	2016-04-18	03:00:00	22.609	2016	4	16
4/18/2016 4:00	2016-04-18	04:00:00	22.609	2016	4	16
4/18/2016 5:00	2016-04-18	05:00:00	22.513	2016	4	16
4/18/2016 6:00	2016-04-18	06:00:00	22.417	2016	4	16
4/18/2016 7:00	2016-04-18	07:00:00	22.417	2016	4	16
4/18/2016 8:00	2016-04-18	08:00:00	22.417	2016	4	16
4/18/2016 9:00	2016-04-18	09:00:00	22.465	2016	4	16
4/18/2016 10:00	2016-04-18	10:00:00	22.585	2016	4	16
4/18/2016 11:00	2016-04-18	11:00:00	22.872	2016	4	16
4/18/2016 12:00	2016-04-18	12:00:00	22.8	2016	4	16
4/18/2016 13:00	2016-04-18	13:00:00	22.896	2016	4	16
4/18/2016 14:00	2016-04-18	14:00:00	22.8	2016	4	16
4/18/2016 15:00	2016-04-18	15:00:00	22.8	2016	4	16
4/18/2016 16:00	2016-04-18	16:00:00	22.776	2016	4	16
4/18/2016 17:00	2016-04-18	17:00:00	22.753	2016	4	16
4/18/2016 18:00	2016-04-18	18:00:00	22.657	2016	4	16
4/18/2016 19:00	2016-04-18	19:00:00	22.609	2016	4	16
4/18/2016 20:00	2016-04-18	20:00:00	22.561	2016	4	16
4/18/2016 21:00	2016-04-18	21:00:00	22.489	2016	4	16
4/18/2016 22:00	2016-04-18	22:00:00	22.417	2016	4	16
4/18/2016 23:00	2016-04-18	23:00:00	22.321	2016	4	16
4/19/2016 0:00	2016-04-19	00:00:00	22.13	2016	4	16
4/19/2016 1:00	2016-04-19	01:00:00	22.011	2016	4	16
4/19/2016 2:00	2016-04-19	02:00:00	21.987	2016	4	16
4/19/2016 3:00	2016-04-19	03:00:00	22.034	2016	4	16
4/19/2016 4:00	2016-04-19	04:00:00	22.011	2016	4	16
4/19/2016 5:00	2016-04-19	05:00:00	22.011	2016	4	16
4/19/2016 6:00	2016-04-19	06:00:00	22.011	2016	4	16
4/19/2016 7:00	2016-04-19	07:00:00	22.011	2016	4	16
4/19/2016 8:00	2016-04-19	08:00:00	22.082	2016	4	16
4/19/2016 9:00	2016-04-19	09:00:00	22.226	2016	4	16
4/19/2016 10:00	2016-04-19	10:00:00	22.274	2016	4	16
4/19/2016 11:00	2016-04-19	11:00:00	22.609	2016	4	16
4/19/2016 12:00	2016-04-19	12:00:00	23.136	2016	4	16
4/19/2016 13:00	2016-04-19	13:00:00	23.521	2016	4	16
4/19/2016 14:00	2016-04-19	14:00:00	23.617	2016	4	16
4/19/2016 15:00	2016-04-19	15:00:00	23.4	2016	4	16
4/19/2016 16:00	2016-04-19	16:00:00	23.16	2016	4	16
4/19/2016 17:00	2016-04-19	17:00:00	22.968	2016	4	16
4/19/2016 18:00	2016-04-19	18:00:00	22.872	2016	4	16
4/19/2016 19:00	2016-04-19	19:00:00	22.729	2016	4	16
4/19/2016 20:00	2016-04-19	20:00:00	22.537	2016	4	16
4/19/2016 21:00	2016-04-19	21:00:00	22.321	2016	4	16
4/19/2016 22:00	2016-04-19	22:00:00	22.202	2016	4	16
4/19/2016 23:00	2016-04-19	23:00:00	22.106	2016	4	16
4/20/2016 0:00	2016-04-20	00:00:00	21.963	2016	4	16
4/20/2016 1:00	2016-04-20	01:00:00	21.795	2016	4	16
4/20/2016 2:00	2016-04-20	02:00:00	21.748	2016	4	16
4/20/2016 3:00	2016-04-20	03:00:00	21.843	2016	4	16
4/20/2016 4:00	2016-04-20	04:00:00	21.843	2016	4	16
4/20/2016 5:00	2016-04-20	05:00:00	21.772	2016	4	16
4/20/2016 6:00	2016-04-20	06:00:00	21.652	2016	4	16
4/20/2016 7:00	2016-04-20	07:00:00	21.7	2016	4	16
4/20/2016 8:00	2016-04-20	08:00:00	21.795	2016	4	16
4/20/2016 9:00	2016-04-20	09:00:00	21.963	2016	4	16
4/20/2016 10:00	2016-04-20	10:00:00	22.154	2016	4	16
4/20/2016 11:00	2016-04-20	11:00:00	22.609	2016	4	16
4/20/2016 12:00	2016-04-20	12:00:00	23.376	2016	4	16
4/20/2016 13:00	2016-04-20	13:00:00	23.833	2016	4	16
4/20/2016 14:00	2016-04-20	14:00:00	24.002	2016	4	16
4/20/2016 15:00	2016-04-20	15:00:00	24.002	2016	4	16
4/20/2016 16:00	2016-04-20	16:00:00	23.905	2016	4	16
4/20/2016 17:00	2016-04-20	17:00:00	23.665	2016	4	16
4/20/2016 18:00	2016-04-20	18:00:00	23.088	2016	4	16
4/20/2016 19:00	2016-04-20	19:00:00	23.04	2016	4	16
4/20/2016 20:00	2016-04-20	20:00:00	23.448	2016	4	16
4/20/2016 21:00	2016-04-20	21:00:00	23.304	2016	4	16
4/20/2016 22:00	2016-04-20	22:00:00	23.352	2016	4	16
4/20/2016 23:00	2016-04-20	23:00:00	23.448	2016	4	16
4/21/2016 0:00	2016-04-21	00:00:00	23.28	2016	4	16
4/21/2016 1:00	2016-04-21	01:00:00	23.112	2016	4	16
4/21/2016 2:00	2016-04-21	02:00:00	23.064	2016	4	16
4/21/2016 3:00	2016-04-21	03:00:00	23.016	2016	4	16
4/21/2016 4:00	2016-04-21	04:00:00	22.944	2016	4	16
4/21/2016 5:00	2016-04-21	05:00:00	22.872	2016	4	16
4/21/2016 6:00	2016-04-21	06:00:00	22.8	2016	4	16
4/21/2016 7:00	2016-04-21	07:00:00	22.848	2016	4	16
4/21/2016 8:00	2016-04-21	08:00:00	22.872	2016	4	16
4/21/2016 9:00	2016-04-21	09:00:00	22.944	2016	4	16
4/21/2016 10:00	2016-04-21	10:00:00	23.16	2016	4	16
4/21/2016 11:00	2016-04-21	11:00:00	23.472	2016	4	16
4/21/2016 12:00	2016-04-21	12:00:00	23.857	2016	4	16
4/21/2016 13:00	2016-04-21	13:00:00	24.219	2016	4	16
4/21/2016 14:00	2016-04-21	14:00:00	24.508	2016	4	16
4/21/2016 15:00	2016-04-21	15:00:00	24.677	2016	4	16
4/21/2016 16:00	2016-04-21	16:00:00	23.978	2016	4	16
4/21/2016 17:00	2016-04-21	17:00:00	23.545	2016	4	16
4/21/2016 18:00	2016-04-21	18:00:00	23.545	2016	4	16
4/21/2016 19:00	2016-04-21	19:00:00	23.4	2016	4	16
4/21/2016 20:00	2016-04-21	20:00:00	23.352	2016	4	16
4/21/2016 21:00	2016-04-21	21:00:00	23.304	2016	4	16
4/21/2016 22:00	2016-04-21	22:00:00	23.208	2016	4	16
4/21/2016 23:00	2016-04-21	23:00:00	23.256	2016	4	16
4/22/2016 0:00	2016-04-22	00:00:00	23.28	2016	4	16
4/22/2016 1:00	2016-04-22	01:00:00	23.328	2016	4	16
4/22/2016 2:00	2016-04-22	02:00:00	23.28	2016	4	16
4/22/2016 3:00	2016-04-22	03:00:00	23.16	2016	4	16
4/22/2016 4:00	2016-04-22	04:00:00	23.064	2016	4	16
4/22/2016 5:00	2016-04-22	05:00:00	23.016	2016	4	16
4/22/2016 6:00	2016-04-22	06:00:00	22.968	2016	4	16
4/22/2016 7:00	2016-04-22	07:00:00	22.968	2016	4	16
4/22/2016 8:00	2016-04-22	08:00:00	23.04	2016	4	16
4/22/2016 9:00	2016-04-22	09:00:00	23.16	2016	4	16
4/22/2016 10:00	2016-04-22	10:00:00	23.28	2016	4	16
4/22/2016 11:00	2016-04-22	11:00:00	23.448	2016	4	16
4/22/2016 12:00	2016-04-22	12:00:00	23.545	2016	4	16
4/22/2016 13:00	2016-04-22	13:00:00	23.689	2016	4	16
4/22/2016 14:00	2016-04-22	14:00:00	23.857	2016	4	16
4/22/2016 15:00	2016-04-22	15:00:00	23.954	2016	4	16
4/22/2016 16:00	2016-04-22	16:00:00	23.521	2016	4	16
4/22/2016 17:00	2016-04-22	17:00:00	23.521	2016	4	16
4/22/2016 18:00	2016-04-22	18:00:00	23.424	2016	4	16
4/22/2016 19:00	2016-04-22	19:00:00	23.256	2016	4	16
4/22/2016 20:00	2016-04-22	20:00:00	23.136	2016	4	16
4/22/2016 21:00	2016-04-22	21:00:00	23.088	2016	4	16
4/22/2016 22:00	2016-04-22	22:00:00	23.112	2016	4	16
4/22/2016 23:00	2016-04-22	23:00:00	23.112	2016	4	16
4/23/2016 0:00	2016-04-23	00:00:00	23.136	2016	4	16
4/23/2016 1:00	2016-04-23	01:00:00	23.112	2016	4	16
4/23/2016 2:00	2016-04-23	02:00:00	23.088	2016	4	16
4/23/2016 3:00	2016-04-23	03:00:00	23.16	2016	4	16
4/23/2016 4:00	2016-04-23	04:00:00	23.088	2016	4	16
4/23/2016 5:00	2016-04-23	05:00:00	23.064	2016	4	16
4/23/2016 6:00	2016-04-23	06:00:00	23.04	2016	4	16
4/23/2016 7:00	2016-04-23	07:00:00	23.04	2016	4	16
4/23/2016 8:00	2016-04-23	08:00:00	23.136	2016	4	16
4/23/2016 9:00	2016-04-23	09:00:00	23.256	2016	4	16
4/23/2016 10:00	2016-04-23	10:00:00	23.545	2016	4	16
4/23/2016 11:00	2016-04-23	11:00:00	23.809	2016	4	16
4/23/2016 12:00	2016-04-23	12:00:00	24.363	2016	4	16
4/23/2016 13:00	2016-04-23	13:00:00	24.968	2016	4	16
4/23/2016 14:00	2016-04-23	14:00:00	25.477	2016	4	16
4/23/2016 15:00	2016-04-23	15:00:00	25.186	2016	4	16
4/23/2016 16:00	2016-04-23	16:00:00	24.895	2016	4	16
4/23/2016 17:00	2016-04-23	17:00:00	24.363	2016	4	16
4/23/2016 18:00	2016-04-23	18:00:00	24.098	2016	4	16
4/23/2016 19:00	2016-04-23	19:00:00	23.761	2016	4	16
4/23/2016 20:00	2016-04-23	20:00:00	23.569	2016	4	16
4/23/2016 21:00	2016-04-23	21:00:00	23.521	2016	4	16
4/23/2016 22:00	2016-04-23	22:00:00	23.497	2016	4	16
4/23/2016 23:00	2016-04-23	23:00:00	23.545	2016	4	16
4/24/2016 0:00	2016-04-24	00:00:00	23.545	2016	4	17
4/24/2016 1:00	2016-04-24	01:00:00	23.593	2016	4	17
4/24/2016 2:00	2016-04-24	02:00:00	23.641	2016	4	17
4/24/2016 3:00	2016-04-24	03:00:00	23.641	2016	4	17
4/24/2016 4:00	2016-04-24	04:00:00	23.641	2016	4	17
4/24/2016 5:00	2016-04-24	05:00:00	23.497	2016	4	17
4/24/2016 6:00	2016-04-24	06:00:00	23.4	2016	4	17
4/24/2016 7:00	2016-04-24	07:00:00	23.4	2016	4	17
4/24/2016 8:00	2016-04-24	08:00:00	23.472	2016	4	17
4/24/2016 9:00	2016-04-24	09:00:00	23.545	2016	4	17
4/24/2016 10:00	2016-04-24	10:00:00	23.689	2016	4	17
4/24/2016 11:00	2016-04-24	11:00:00	24.026	2016	4	17
4/24/2016 12:00	2016-04-24	12:00:00	24.508	2016	4	17
4/24/2016 13:00	2016-04-24	13:00:00	25.137	2016	4	17
4/24/2016 14:00	2016-04-24	14:00:00	25.695	2016	4	17
4/24/2016 15:00	2016-04-24	15:00:00	25.768	2016	4	17
4/24/2016 16:00	2016-04-24	16:00:00	24.871	2016	4	17
4/24/2016 17:00	2016-04-24	17:00:00	24.267	2016	4	17
4/24/2016 18:00	2016-04-24	18:00:00	24.074	2016	4	17
4/24/2016 19:00	2016-04-24	19:00:00	23.881	2016	4	17
4/24/2016 20:00	2016-04-24	20:00:00	23.785	2016	4	17
4/24/2016 21:00	2016-04-24	21:00:00	23.737	2016	4	17
4/24/2016 22:00	2016-04-24	22:00:00	23.761	2016	4	17
4/24/2016 23:00	2016-04-24	23:00:00	23.761	2016	4	17
4/25/2016 0:00	2016-04-25	00:00:00	23.761	2016	4	17
4/25/2016 1:00	2016-04-25	01:00:00	23.689	2016	4	17
4/25/2016 2:00	2016-04-25	02:00:00	23.617	2016	4	17
4/25/2016 3:00	2016-04-25	03:00:00	23.569	2016	4	17
4/25/2016 4:00	2016-04-25	04:00:00	23.545	2016	4	17
4/25/2016 5:00	2016-04-25	05:00:00	23.569	2016	4	17
4/25/2016 6:00	2016-04-25	06:00:00	23.617	2016	4	17
4/25/2016 7:00	2016-04-25	07:00:00	23.593	2016	4	17
4/25/2016 8:00	2016-04-25	08:00:00	23.689	2016	4	17
4/25/2016 9:00	2016-04-25	09:00:00	23.785	2016	4	17
4/25/2016 10:00	2016-04-25	10:00:00	23.881	2016	4	17
4/25/2016 11:00	2016-04-25	11:00:00	24.122	2016	4	17
4/25/2016 12:00	2016-04-25	12:00:00	23.93	2016	4	17
4/25/2016 13:00	2016-04-25	13:00:00	24.291	2016	4	17
4/25/2016 14:00	2016-04-25	14:00:00	24.484	2016	4	17
4/25/2016 15:00	2016-04-25	15:00:00	25.113	2016	4	17
4/25/2016 16:00	2016-04-25	16:00:00	25.137	2016	4	17
4/25/2016 17:00	2016-04-25	17:00:00	24.653	2016	4	17
4/25/2016 18:00	2016-04-25	18:00:00	24.074	2016	4	17
4/25/2016 19:00	2016-04-25	19:00:00	23.978	2016	4	17
4/25/2016 20:00	2016-04-25	20:00:00	23.857	2016	4	17
4/25/2016 21:00	2016-04-25	21:00:00	23.833	2016	4	17
4/25/2016 22:00	2016-04-25	22:00:00	23.833	2016	4	17
4/25/2016 23:00	2016-04-25	23:00:00	23.833	2016	4	17
4/26/2016 0:00	2016-04-26	00:00:00	23.809	2016	4	17
4/26/2016 1:00	2016-04-26	01:00:00	23.857	2016	4	17
4/26/2016 2:00	2016-04-26	02:00:00	23.857	2016	4	17
4/26/2016 3:00	2016-04-26	03:00:00	23.833	2016	4	17
4/26/2016 4:00	2016-04-26	04:00:00	23.785	2016	4	17
4/26/2016 5:00	2016-04-26	05:00:00	23.665	2016	4	17
4/26/2016 6:00	2016-04-26	06:00:00	23.617	2016	4	17
4/26/2016 7:00	2016-04-26	07:00:00	23.641	2016	4	17
4/26/2016 8:00	2016-04-26	08:00:00	23.641	2016	4	17
4/26/2016 9:00	2016-04-26	09:00:00	23.689	2016	4	17
4/26/2016 10:00	2016-04-26	10:00:00	23.857	2016	4	17
4/26/2016 11:00	2016-04-26	11:00:00	24.146	2016	4	17
4/26/2016 12:00	2016-04-26	12:00:00	24.363	2016	4	17
4/26/2016 13:00	2016-04-26	13:00:00	24.944	2016	4	17
4/26/2016 14:00	2016-04-26	14:00:00	25.55	2016	4	17
4/26/2016 15:00	2016-04-26	15:00:00	26.085	2016	4	17
4/26/2016 16:00	2016-04-26	16:00:00	26.036	2016	4	17
4/26/2016 17:00	2016-04-26	17:00:00	24.532	2016	4	17
4/26/2016 18:00	2016-04-26	18:00:00	23.954	2016	4	17
4/26/2016 19:00	2016-04-26	19:00:00	24.05	2016	4	17
4/26/2016 20:00	2016-04-26	20:00:00	24.219	2016	4	17
4/26/2016 21:00	2016-04-26	21:00:00	24.219	2016	4	17
4/26/2016 22:00	2016-04-26	22:00:00	24.026	2016	4	17
4/26/2016 23:00	2016-04-26	23:00:00	24.074	2016	4	17
4/27/2016 0:00	2016-04-27	00:00:00	24.002	2016	4	17
4/27/2016 1:00	2016-04-27	01:00:00	24.146	2016	4	17
4/27/2016 2:00	2016-04-27	02:00:00	24.122	2016	4	17
4/27/2016 3:00	2016-04-27	03:00:00	24.122	2016	4	17
4/27/2016 4:00	2016-04-27	04:00:00	24.05	2016	4	17
4/27/2016 5:00	2016-04-27	05:00:00	23.978	2016	4	17
4/27/2016 6:00	2016-04-27	06:00:00	23.93	2016	4	17
4/27/2016 7:00	2016-04-27	07:00:00	23.93	2016	4	17
4/27/2016 8:00	2016-04-27	08:00:00	23.978	2016	4	17
4/27/2016 9:00	2016-04-27	09:00:00	23.93	2016	4	17
4/27/2016 10:00	2016-04-27	10:00:00	23.93	2016	4	17
4/27/2016 11:00	2016-04-27	11:00:00	24.098	2016	4	17
4/27/2016 12:00	2016-04-27	12:00:00	24.412	2016	4	17
4/27/2016 13:00	2016-04-27	13:00:00	24.726	2016	4	17
4/27/2016 14:00	2016-04-27	14:00:00	25.04	2016	4	17
4/27/2016 15:00	2016-04-27	15:00:00	25.21	2016	4	17
4/27/2016 16:00	2016-04-27	16:00:00	25.089	2016	4	17
4/27/2016 17:00	2016-04-27	17:00:00	24.653	2016	4	17
4/27/2016 18:00	2016-04-27	18:00:00	24.267	2016	4	17
4/27/2016 19:00	2016-04-27	19:00:00	24.122	2016	4	17
4/27/2016 20:00	2016-04-27	20:00:00	24.026	2016	4	17
4/27/2016 21:00	2016-04-27	21:00:00	23.978	2016	4	17
4/27/2016 22:00	2016-04-27	22:00:00	24.002	2016	4	17
4/27/2016 23:00	2016-04-27	23:00:00	23.978	2016	4	17
4/28/2016 0:00	2016-04-28	00:00:00	23.93	2016	4	17
4/28/2016 1:00	2016-04-28	01:00:00	23.93	2016	4	17
4/28/2016 2:00	2016-04-28	02:00:00	23.93	2016	4	17
4/28/2016 3:00	2016-04-28	03:00:00	23.881	2016	4	17
4/28/2016 4:00	2016-04-28	04:00:00	23.833	2016	4	17
4/28/2016 5:00	2016-04-28	05:00:00	23.737	2016	4	17
4/28/2016 6:00	2016-04-28	06:00:00	23.689	2016	4	17
4/28/2016 7:00	2016-04-28	07:00:00	23.641	2016	4	17
4/28/2016 8:00	2016-04-28	08:00:00	23.761	2016	4	17
4/28/2016 9:00	2016-04-28	09:00:00	23.833	2016	4	17
4/28/2016 10:00	2016-04-28	10:00:00	23.978	2016	4	17
4/28/2016 11:00	2016-04-28	11:00:00	24.026	2016	4	17
4/28/2016 12:00	2016-04-28	12:00:00	24.074	2016	4	17
4/28/2016 13:00	2016-04-28	13:00:00	24.122	2016	4	17
4/28/2016 14:00	2016-04-28	14:00:00	24.122	2016	4	17
4/28/2016 15:00	2016-04-28	15:00:00	24.267	2016	4	17
4/28/2016 16:00	2016-04-28	16:00:00	24.46	2016	4	17
4/28/2016 17:00	2016-04-28	17:00:00	24.098	2016	4	17
4/28/2016 18:00	2016-04-28	18:00:00	23.954	2016	4	17
4/28/2016 19:00	2016-04-28	19:00:00	23.689	2016	4	17
4/28/2016 20:00	2016-04-28	20:00:00	23.545	2016	4	17
4/28/2016 21:00	2016-04-28	21:00:00	23.448	2016	4	17
4/28/2016 22:00	2016-04-28	22:00:00	23.328	2016	4	17
4/28/2016 23:00	2016-04-28	23:00:00	23.208	2016	4	17
4/29/2016 0:00	2016-04-29	00:00:00	23.256	2016	4	17
4/29/2016 1:00	2016-04-29	01:00:00	23.184	2016	4	17
4/29/2016 2:00	2016-04-29	02:00:00	23.04	2016	4	17
4/29/2016 3:00	2016-04-29	03:00:00	22.824	2016	4	17
4/29/2016 4:00	2016-04-29	04:00:00	22.776	2016	4	17
4/29/2016 5:00	2016-04-29	05:00:00	22.824	2016	4	17
4/29/2016 6:00	2016-04-29	06:00:00	22.345	2016	4	17
4/29/2016 7:00	2016-04-29	07:00:00	22.441	2016	4	17
4/29/2016 8:00	2016-04-29	08:00:00	22.776	2016	4	17
4/29/2016 9:00	2016-04-29	09:00:00	22.968	2016	4	17
4/29/2016 10:00	2016-04-29	10:00:00	23.088	2016	4	17
4/29/2016 11:00	2016-04-29	11:00:00	23.184	2016	4	17
4/29/2016 12:00	2016-04-29	12:00:00	23.472	2016	4	17
4/29/2016 13:00	2016-04-29	13:00:00	23.665	2016	4	17
4/29/2016 14:00	2016-04-29	14:00:00	23.857	2016	4	17
4/29/2016 15:00	2016-04-29	15:00:00	24.219	2016	4	17
4/29/2016 16:00	2016-04-29	16:00:00	24.122	2016	4	17
4/29/2016 17:00	2016-04-29	17:00:00	24.05	2016	4	17
4/29/2016 18:00	2016-04-29	18:00:00	23.905	2016	4	17
4/29/2016 19:00	2016-04-29	19:00:00	23.545	2016	4	17
4/29/2016 20:00	2016-04-29	20:00:00	23.376	2016	4	17
4/29/2016 21:00	2016-04-29	21:00:00	23.256	2016	4	17
4/29/2016 22:00	2016-04-29	22:00:00	23.184	2016	4	17
4/29/2016 23:00	2016-04-29	23:00:00	23.064	2016	4	17
4/30/2016 0:00	2016-04-30	00:00:00	23.016	2016	4	17
4/30/2016 1:00	2016-04-30	01:00:00	23.016	2016	4	17
4/30/2016 2:00	2016-04-30	02:00:00	22.968	2016	4	17
4/30/2016 3:00	2016-04-30	03:00:00	22.848	2016	4	17
4/30/2016 4:00	2016-04-30	04:00:00	22.681	2016	4	17
4/30/2016 5:00	2016-04-30	05:00:00	22.585	2016	4	17
4/30/2016 6:00	2016-04-30	06:00:00	22.561	2016	4	17
4/30/2016 7:00	2016-04-30	07:00:00	22.585	2016	4	17
4/30/2016 8:00	2016-04-30	08:00:00	22.609	2016	4	17
4/30/2016 9:00	2016-04-30	09:00:00	22.824	2016	4	17
4/30/2016 10:00	2016-04-30	10:00:00	23.064	2016	4	17
4/30/2016 11:00	2016-04-30	11:00:00	23.424	2016	4	17
4/30/2016 12:00	2016-04-30	12:00:00	23.785	2016	4	17
4/30/2016 13:00	2016-04-30	13:00:00	24.122	2016	4	17
4/30/2016 14:00	2016-04-30	14:00:00	24.412	2016	4	17
4/30/2016 15:00	2016-04-30	15:00:00	24.677	2016	4	17
4/30/2016 16:00	2016-04-30	16:00:00	24.484	2016	4	17
4/30/2016 17:00	2016-04-30	17:00:00	24.46	2016	4	17
4/30/2016 18:00	2016-04-30	18:00:00	24.267	2016	4	17
4/30/2016 19:00	2016-04-30	19:00:00	24.122	2016	4	17
4/30/2016 20:00	2016-04-30	20:00:00	23.978	2016	4	17
4/30/2016 21:00	2016-04-30	21:00:00	23.833	2016	4	17
4/30/2016 22:00	2016-04-30	22:00:00	23.617	2016	4	17
4/30/2016 23:00	2016-04-30	23:00:00	23.569	2016	4	17
2016-01-05	2016-05-01	00:00:00	23.521	2016	5	18
2016-01-05 01:00:00	2016-05-01	01:00:00	23.497	2016	5	18
2016-01-05 02:00:00	2016-05-01	02:00:00	23.4	2016	5	18
2016-01-05 03:00:00	2016-05-01	03:00:00	23.376	2016	5	18
2016-01-05 04:00:00	2016-05-01	04:00:00	23.352	2016	5	18
2016-01-05 05:00:00	2016-05-01	05:00:00	23.352	2016	5	18
2016-01-05 06:00:00	2016-05-01	06:00:00	23.328	2016	5	18
2016-01-05 07:00:00	2016-05-01	07:00:00	23.208	2016	5	18
2016-01-05 08:00:00	2016-05-01	08:00:00	23.256	2016	5	18
2016-01-05 09:00:00	2016-05-01	09:00:00	23.376	2016	5	18
2016-01-05 10:00:00	2016-05-01	10:00:00	23.617	2016	5	18
2016-01-05 11:00:00	2016-05-01	11:00:00	23.905	2016	5	18
2016-01-05 12:00:00	2016-05-01	12:00:00	24.026	2016	5	18
2016-01-05 13:00:00	2016-05-01	13:00:00	24.026	2016	5	18
2016-01-05 14:00:00	2016-05-01	14:00:00	23.954	2016	5	18
2016-01-05 15:00:00	2016-05-01	15:00:00	24.026	2016	5	18
2016-01-05 16:00:00	2016-05-01	16:00:00	24.098	2016	5	18
2016-01-05 17:00:00	2016-05-01	17:00:00	24.339	2016	5	18
2016-01-05 18:00:00	2016-05-01	18:00:00	24.339	2016	5	18
2016-01-05 19:00:00	2016-05-01	19:00:00	24.122	2016	5	18
2016-01-05 20:00:00	2016-05-01	20:00:00	24.002	2016	5	18
2016-01-05 21:00:00	2016-05-01	21:00:00	23.881	2016	5	18
2016-01-05 22:00:00	2016-05-01	22:00:00	23.881	2016	5	18
2016-01-05 23:00:00	2016-05-01	23:00:00	23.785	2016	5	18
2016-02-05	2016-05-02	00:00:00	23.641	2016	5	18
2016-02-05 01:00:00	2016-05-02	01:00:00	23.545	2016	5	18
2016-02-05 02:00:00	2016-05-02	02:00:00	23.448	2016	5	18
2016-02-05 03:00:00	2016-05-02	03:00:00	23.424	2016	5	18
2016-02-05 04:00:00	2016-05-02	04:00:00	23.4	2016	5	18
2016-02-05 05:00:00	2016-05-02	05:00:00	23.376	2016	5	18
2016-02-05 06:00:00	2016-05-02	06:00:00	23.28	2016	5	18
2016-02-05 07:00:00	2016-05-02	07:00:00	23.256	2016	5	18
2016-02-05 08:00:00	2016-05-02	08:00:00	23.4	2016	5	18
2016-02-05 09:00:00	2016-05-02	09:00:00	23.4	2016	5	18
2016-02-05 10:00:00	2016-05-02	10:00:00	23.472	2016	5	18
2016-02-05 11:00:00	2016-05-02	11:00:00	23.617	2016	5	18
2016-02-05 12:00:00	2016-05-02	12:00:00	23.905	2016	5	18
2016-02-05 13:00:00	2016-05-02	13:00:00	24.219	2016	5	18
2016-02-05 14:00:00	2016-05-02	14:00:00	24.436	2016	5	18
2016-02-05 15:00:00	2016-05-02	15:00:00	24.532	2016	5	18
2016-02-05 16:00:00	2016-05-02	16:00:00	24.629	2016	5	18
2016-02-05 17:00:00	2016-05-02	17:00:00	24.677	2016	5	18
2016-02-05 18:00:00	2016-05-02	18:00:00	24.532	2016	5	18
2016-02-05 19:00:00	2016-05-02	19:00:00	24.363	2016	5	18
2016-02-05 20:00:00	2016-05-02	20:00:00	24.122	2016	5	18
2016-02-05 21:00:00	2016-05-02	21:00:00	23.954	2016	5	18
2016-02-05 22:00:00	2016-05-02	22:00:00	23.809	2016	5	18
2016-02-05 23:00:00	2016-05-02	23:00:00	23.593	2016	5	18
2016-03-05	2016-05-03	00:00:00	23.593	2016	5	18
2016-03-05 01:00:00	2016-05-03	01:00:00	23.593	2016	5	18
2016-03-05 02:00:00	2016-05-03	02:00:00	23.4	2016	5	18
2016-03-05 03:00:00	2016-05-03	03:00:00	23.184	2016	5	18
2016-03-05 04:00:00	2016-05-03	04:00:00	23.184	2016	5	18
2016-03-05 05:00:00	2016-05-03	05:00:00	23.328	2016	5	18
2016-03-05 06:00:00	2016-05-03	06:00:00	23.304	2016	5	18
2016-03-05 07:00:00	2016-05-03	07:00:00	23.304	2016	5	18
2016-03-05 08:00:00	2016-05-03	08:00:00	23.328	2016	5	18
2016-03-05 09:00:00	2016-05-03	09:00:00	23.448	2016	5	18
2016-03-05 10:00:00	2016-05-03	10:00:00	23.497	2016	5	18
2016-03-05 11:00:00	2016-05-03	11:00:00	23.689	2016	5	18
2016-03-05 12:00:00	2016-05-03	12:00:00	23.737	2016	5	18
2016-03-05 13:00:00	2016-05-03	13:00:00	23.737	2016	5	18
2016-03-05 14:00:00	2016-05-03	14:00:00	23.689	2016	5	18
2016-03-05 15:00:00	2016-05-03	15:00:00	23.689	2016	5	18
2016-03-05 16:00:00	2016-05-03	16:00:00	23.689	2016	5	18
2016-03-05 17:00:00	2016-05-03	17:00:00	23.665	2016	5	18
2016-03-05 18:00:00	2016-05-03	18:00:00	23.689	2016	5	18
2016-03-05 19:00:00	2016-05-03	19:00:00	23.593	2016	5	18
2016-03-05 20:00:00	2016-05-03	20:00:00	23.497	2016	5	18
2016-03-05 21:00:00	2016-05-03	21:00:00	23.328	2016	5	18
2016-03-05 22:00:00	2016-05-03	22:00:00	23.088	2016	5	18
2016-03-05 23:00:00	2016-05-03	23:00:00	22.753	2016	5	18
2016-04-05	2016-05-04	00:00:00	22.561	2016	5	18
2016-04-05 01:00:00	2016-05-04	01:00:00	22.489	2016	5	18
2016-04-05 02:00:00	2016-05-04	02:00:00	22.585	2016	5	18
2016-04-05 03:00:00	2016-05-04	03:00:00	22.633	2016	5	18
2016-04-05 04:00:00	2016-05-04	04:00:00	22.561	2016	5	18
2016-04-05 05:00:00	2016-05-04	05:00:00	22.417	2016	5	18
2016-04-05 06:00:00	2016-05-04	06:00:00	22.417	2016	5	18
2016-04-05 07:00:00	2016-05-04	07:00:00	22.226	2016	5	18
2016-04-05 08:00:00	2016-05-04	08:00:00	22.298	2016	5	18
2016-04-05 09:00:00	2016-05-04	09:00:00	22.585	2016	5	18
2016-04-05 10:00:00	2016-05-04	10:00:00	23.04	2016	5	18
2016-04-05 11:00:00	2016-05-04	11:00:00	23.617	2016	5	18
2016-04-05 12:00:00	2016-05-04	12:00:00	24.243	2016	5	18
2016-04-05 13:00:00	2016-05-04	13:00:00	24.436	2016	5	18
2016-04-05 14:00:00	2016-05-04	14:00:00	24.436	2016	5	18
2016-04-05 15:00:00	2016-05-04	15:00:00	24.315	2016	5	18
2016-04-05 16:00:00	2016-05-04	16:00:00	24.219	2016	5	18
2016-04-05 17:00:00	2016-05-04	17:00:00	24.026	2016	5	18
2016-04-05 18:00:00	2016-05-04	18:00:00	23.954	2016	5	18
2016-04-05 19:00:00	2016-05-04	19:00:00	23.857	2016	5	18
2016-04-05 20:00:00	2016-05-04	20:00:00	23.833	2016	5	18
2016-04-05 21:00:00	2016-05-04	21:00:00	23.93	2016	5	18
2016-04-05 22:00:00	2016-05-04	22:00:00	23.881	2016	5	18
2016-04-05 23:00:00	2016-05-04	23:00:00	23.713	2016	5	18
2016-05-05	2016-05-05	00:00:00	23.472	2016	5	18
2016-05-05 01:00:00	2016-05-05	01:00:00	23.4	2016	5	18
2016-05-05 02:00:00	2016-05-05	02:00:00	23.376	2016	5	18
2016-05-05 03:00:00	2016-05-05	03:00:00	23.304	2016	5	18
2016-05-05 04:00:00	2016-05-05	04:00:00	23.28	2016	5	18
2016-05-05 05:00:00	2016-05-05	05:00:00	23.112	2016	5	18
2016-05-05 06:00:00	2016-05-05	06:00:00	23.064	2016	5	18
2016-05-05 07:00:00	2016-05-05	07:00:00	22.92	2016	5	18
2016-05-05 08:00:00	2016-05-05	08:00:00	22.92	2016	5	18
2016-05-05 09:00:00	2016-05-05	09:00:00	22.848	2016	5	18
2016-05-05 10:00:00	2016-05-05	10:00:00	23.04	2016	5	18
2016-05-05 11:00:00	2016-05-05	11:00:00	23.184	2016	5	18
2016-05-05 12:00:00	2016-05-05	12:00:00	23.376	2016	5	18
2016-05-05 13:00:00	2016-05-05	13:00:00	23.569	2016	5	18
2016-05-05 14:00:00	2016-05-05	14:00:00	23.617	2016	5	18
2016-05-05 15:00:00	2016-05-05	15:00:00	23.689	2016	5	18
2016-05-05 16:00:00	2016-05-05	16:00:00	23.545	2016	5	18
2016-05-05 17:00:00	2016-05-05	17:00:00	23.448	2016	5	18
2016-05-05 18:00:00	2016-05-05	18:00:00	23.256	2016	5	18
2016-05-05 19:00:00	2016-05-05	19:00:00	23.256	2016	5	18
2016-05-05 20:00:00	2016-05-05	20:00:00	23.424	2016	5	18
2016-05-05 21:00:00	2016-05-05	21:00:00	23.28	2016	5	18
2016-05-05 22:00:00	2016-05-05	22:00:00	23.256	2016	5	18
2016-05-05 23:00:00	2016-05-05	23:00:00	23.184	2016	5	18
2016-06-05	2016-05-06	00:00:00	23.136	2016	5	18
2016-06-05 01:00:00	2016-05-06	01:00:00	23.112	2016	5	18
2016-06-05 02:00:00	2016-05-06	02:00:00	23.088	2016	5	18
2016-06-05 03:00:00	2016-05-06	03:00:00	23.064	2016	5	18
2016-06-05 04:00:00	2016-05-06	04:00:00	23.064	2016	5	18
2016-06-05 05:00:00	2016-05-06	05:00:00	23.064	2016	5	18
2016-06-05 06:00:00	2016-05-06	06:00:00	23.088	2016	5	18
2016-06-05 07:00:00	2016-05-06	07:00:00	23.112	2016	5	18
2016-06-05 08:00:00	2016-05-06	08:00:00	23.16	2016	5	18
2016-06-05 09:00:00	2016-05-06	09:00:00	23.28	2016	5	18
2016-06-05 10:00:00	2016-05-06	10:00:00	23.497	2016	5	18
2016-06-05 11:00:00	2016-05-06	11:00:00	23.833	2016	5	18
2016-06-05 12:00:00	2016-05-06	12:00:00	24.532	2016	5	18
2016-06-05 13:00:00	2016-05-06	13:00:00	25.04	2016	5	18
2016-06-05 14:00:00	2016-05-06	14:00:00	25.307	2016	5	18
2016-06-05 15:00:00	2016-05-06	15:00:00	25.21	2016	5	18
2016-06-05 16:00:00	2016-05-06	16:00:00	24.508	2016	5	18
2016-06-05 17:00:00	2016-05-06	17:00:00	24.388	2016	5	18
2016-06-05 18:00:00	2016-05-06	18:00:00	24.146	2016	5	18
2016-06-05 19:00:00	2016-05-06	19:00:00	24.05	2016	5	18
2016-06-05 20:00:00	2016-05-06	20:00:00	23.713	2016	5	18
2016-06-05 21:00:00	2016-05-06	21:00:00	23.641	2016	5	18
2016-06-05 22:00:00	2016-05-06	22:00:00	23.641	2016	5	18
2016-06-05 23:00:00	2016-05-06	23:00:00	23.593	2016	5	18
2016-07-05	2016-05-07	00:00:00	23.713	2016	5	18
2016-07-05 01:00:00	2016-05-07	01:00:00	23.833	2016	5	18
2016-07-05 02:00:00	2016-05-07	02:00:00	23.737	2016	5	18
2016-07-05 03:00:00	2016-05-07	03:00:00	23.665	2016	5	18
2016-07-05 04:00:00	2016-05-07	04:00:00	23.593	2016	5	18
2016-07-05 05:00:00	2016-05-07	05:00:00	23.617	2016	5	18
2016-07-05 06:00:00	2016-05-07	06:00:00	23.593	2016	5	18
2016-07-05 07:00:00	2016-05-07	07:00:00	23.569	2016	5	18
2016-07-05 08:00:00	2016-05-07	08:00:00	23.593	2016	5	18
2016-07-05 09:00:00	2016-05-07	09:00:00	23.641	2016	5	18
2016-07-05 10:00:00	2016-05-07	10:00:00	23.713	2016	5	18
2016-07-05 11:00:00	2016-05-07	11:00:00	23.93	2016	5	18
2016-07-05 12:00:00	2016-05-07	12:00:00	24.46	2016	5	18
2016-07-05 13:00:00	2016-05-07	13:00:00	25.428	2016	5	18
2016-07-05 14:00:00	2016-05-07	14:00:00	25.574	2016	5	18
2016-07-05 15:00:00	2016-05-07	15:00:00	25.768	2016	5	18
2016-07-05 16:00:00	2016-05-07	16:00:00	25.987	2016	5	18
2016-07-05 17:00:00	2016-05-07	17:00:00	24.774	2016	5	18
2016-07-05 18:00:00	2016-05-07	18:00:00	24.002	2016	5	18
2016-07-05 19:00:00	2016-05-07	19:00:00	23.93	2016	5	18
2016-07-05 20:00:00	2016-05-07	20:00:00	24.002	2016	5	18
2016-07-05 21:00:00	2016-05-07	21:00:00	23.905	2016	5	18
2016-07-05 22:00:00	2016-05-07	22:00:00	24.002	2016	5	18
2016-07-05 23:00:00	2016-05-07	23:00:00	23.954	2016	5	18
2016-08-05	2016-05-08	00:00:00	23.761	2016	5	19
2016-08-05 01:00:00	2016-05-08	01:00:00	23.785	2016	5	19
2016-08-05 02:00:00	2016-05-08	02:00:00	23.954	2016	5	19
2016-08-05 03:00:00	2016-05-08	03:00:00	23.93	2016	5	19
2016-08-05 04:00:00	2016-05-08	04:00:00	23.93	2016	5	19
2016-08-05 05:00:00	2016-05-08	05:00:00	23.93	2016	5	19
2016-08-05 06:00:00	2016-05-08	06:00:00	23.881	2016	5	19
2016-08-05 07:00:00	2016-05-08	07:00:00	23.905	2016	5	19
2016-08-05 08:00:00	2016-05-08	08:00:00	24.026	2016	5	19
2016-08-05 09:00:00	2016-05-08	09:00:00	24.05	2016	5	19
2016-08-05 10:00:00	2016-05-08	10:00:00	24.291	2016	5	19
2016-08-05 11:00:00	2016-05-08	11:00:00	24.629	2016	5	19
2016-08-05 12:00:00	2016-05-08	12:00:00	25.186	2016	5	19
2016-08-05 13:00:00	2016-05-08	13:00:00	26.012	2016	5	19
2016-08-05 14:00:00	2016-05-08	14:00:00	26.207	2016	5	19
2016-08-05 15:00:00	2016-05-08	15:00:00	26.402	2016	5	19
2016-08-05 16:00:00	2016-05-08	16:00:00	26.378	2016	5	19
2016-08-05 17:00:00	2016-05-08	17:00:00	25.671	2016	5	19
2016-08-05 18:00:00	2016-05-08	18:00:00	25.016	2016	5	19
2016-08-05 19:00:00	2016-05-08	19:00:00	24.653	2016	5	19
2016-08-05 20:00:00	2016-05-08	20:00:00	24.436	2016	5	19
2016-08-05 21:00:00	2016-05-08	21:00:00	24.291	2016	5	19
2016-08-05 22:00:00	2016-05-08	22:00:00	24.219	2016	5	19
2016-08-05 23:00:00	2016-05-08	23:00:00	24.315	2016	5	19
2016-09-05	2016-05-09	00:00:00	24.339	2016	5	19
2016-09-05 01:00:00	2016-05-09	01:00:00	24.315	2016	5	19
2016-09-05 02:00:00	2016-05-09	02:00:00	24.315	2016	5	19
2016-09-05 03:00:00	2016-05-09	03:00:00	24.339	2016	5	19
2016-09-05 04:00:00	2016-05-09	04:00:00	24.363	2016	5	19
2016-09-05 05:00:00	2016-05-09	05:00:00	24.363	2016	5	19
2016-09-05 06:00:00	2016-05-09	06:00:00	24.122	2016	5	19
2016-09-05 07:00:00	2016-05-09	07:00:00	24.122	2016	5	19
2016-09-05 08:00:00	2016-05-09	08:00:00	24.219	2016	5	19
2016-09-05 09:00:00	2016-05-09	09:00:00	24.315	2016	5	19
2016-09-05 10:00:00	2016-05-09	10:00:00	24.46	2016	5	19
2016-09-05 11:00:00	2016-05-09	11:00:00	24.629	2016	5	19
2016-09-05 12:00:00	2016-05-09	12:00:00	25.089	2016	5	19
2016-09-05 13:00:00	2016-05-09	13:00:00	25.987	2016	5	19
2016-09-05 14:00:00	2016-05-09	14:00:00	26.842	2016	5	19
2016-09-05 15:00:00	2016-05-09	15:00:00	26.573	2016	5	19
2016-09-05 16:00:00	2016-05-09	16:00:00	26.28	2016	5	19
2016-09-05 17:00:00	2016-05-09	17:00:00	25.939	2016	5	19
2016-09-05 18:00:00	2016-05-09	18:00:00	25.065	2016	5	19
2016-09-05 19:00:00	2016-05-09	19:00:00	24.75	2016	5	19
2016-09-05 20:00:00	2016-05-09	20:00:00	24.677	2016	5	19
2016-09-05 21:00:00	2016-05-09	21:00:00	24.774	2016	5	19
2016-09-05 22:00:00	2016-05-09	22:00:00	24.677	2016	5	19
2016-09-05 23:00:00	2016-05-09	23:00:00	24.581	2016	5	19
2016-10-05	2016-05-10	00:00:00	24.653	2016	5	19
2016-10-05 01:00:00	2016-05-10	01:00:00	24.677	2016	5	19
2016-10-05 02:00:00	2016-05-10	02:00:00	24.702	2016	5	19
2016-10-05 03:00:00	2016-05-10	03:00:00	24.653	2016	5	19
2016-10-05 04:00:00	2016-05-10	04:00:00	24.605	2016	5	19
2016-10-05 05:00:00	2016-05-10	05:00:00	24.605	2016	5	19
2016-10-05 06:00:00	2016-05-10	06:00:00	24.532	2016	5	19
2016-10-05 07:00:00	2016-05-10	07:00:00	24.557	2016	5	19
2016-10-05 08:00:00	2016-05-10	08:00:00	24.605	2016	5	19
2016-10-05 09:00:00	2016-05-10	09:00:00	24.75	2016	5	19
2016-10-05 10:00:00	2016-05-10	10:00:00	24.968	2016	5	19
2016-10-05 11:00:00	2016-05-10	11:00:00	25.137	2016	5	19
2016-10-05 12:00:00	2016-05-10	12:00:00	25.453	2016	5	19
2016-10-05 13:00:00	2016-05-10	13:00:00	25.695	2016	5	19
2016-10-05 14:00:00	2016-05-10	14:00:00	25.987	2016	5	19
2016-10-05 15:00:00	2016-05-10	15:00:00	26.451	2016	5	19
2016-10-05 16:00:00	2016-05-10	16:00:00	26.304	2016	5	19
2016-10-05 17:00:00	2016-05-10	17:00:00	25.866	2016	5	19
2016-10-05 18:00:00	2016-05-10	18:00:00	25.963	2016	5	19
2016-10-05 19:00:00	2016-05-10	19:00:00	25.113	2016	5	19
2016-10-05 20:00:00	2016-05-10	20:00:00	24.847	2016	5	19
2016-10-05 21:00:00	2016-05-10	21:00:00	24.726	2016	5	19
2016-10-05 22:00:00	2016-05-10	22:00:00	24.653	2016	5	19
2016-10-05 23:00:00	2016-05-10	23:00:00	24.605	2016	5	19
2016-11-05	2016-05-11	00:00:00	24.605	2016	5	19
2016-11-05 01:00:00	2016-05-11	01:00:00	24.605	2016	5	19
2016-11-05 02:00:00	2016-05-11	02:00:00	24.605	2016	5	19
2016-11-05 03:00:00	2016-05-11	03:00:00	24.532	2016	5	19
2016-11-05 04:00:00	2016-05-11	04:00:00	24.508	2016	5	19
2016-11-05 05:00:00	2016-05-11	05:00:00	24.46	2016	5	19
2016-11-05 06:00:00	2016-05-11	06:00:00	24.412	2016	5	19
2016-11-05 07:00:00	2016-05-11	07:00:00	24.436	2016	5	19
2016-11-05 08:00:00	2016-05-11	08:00:00	24.436	2016	5	19
2016-11-05 09:00:00	2016-05-11	09:00:00	24.388	2016	5	19
2016-11-05 10:00:00	2016-05-11	10:00:00	24.412	2016	5	19
2016-11-05 11:00:00	2016-05-11	11:00:00	24.508	2016	5	19
2016-11-05 12:00:00	2016-05-11	12:00:00	24.46	2016	5	19
2016-11-05 13:00:00	2016-05-11	13:00:00	24.484	2016	5	19
2016-11-05 14:00:00	2016-05-11	14:00:00	24.629	2016	5	19
2016-11-05 15:00:00	2016-05-11	15:00:00	24.677	2016	5	19
2016-11-05 16:00:00	2016-05-11	16:00:00	24.798	2016	5	19
2016-11-05 17:00:00	2016-05-11	17:00:00	24.847	2016	5	19
2016-11-05 18:00:00	2016-05-11	18:00:00	24.629	2016	5	19
2016-11-05 19:00:00	2016-05-11	19:00:00	24.46	2016	5	19
2016-11-05 20:00:00	2016-05-11	20:00:00	24.315	2016	5	19
2016-11-05 21:00:00	2016-05-11	21:00:00	24.219	2016	5	19
2016-11-05 22:00:00	2016-05-11	22:00:00	24.243	2016	5	19
2016-11-05 23:00:00	2016-05-11	23:00:00	24.195	2016	5	19
2016-12-05	2016-05-12	00:00:00	24.05	2016	5	19
2016-12-05 01:00:00	2016-05-12	01:00:00	23.978	2016	5	19
2016-12-05 02:00:00	2016-05-12	02:00:00	23.857	2016	5	19
2016-12-05 03:00:00	2016-05-12	03:00:00	23.809	2016	5	19
2016-12-05 04:00:00	2016-05-12	04:00:00	23.978	2016	5	19
2016-12-05 05:00:00	2016-05-12	05:00:00	23.857	2016	5	19
2016-12-05 06:00:00	2016-05-12	06:00:00	23.665	2016	5	19
2016-12-05 07:00:00	2016-05-12	07:00:00	23.689	2016	5	19
2016-12-05 08:00:00	2016-05-12	08:00:00	23.857	2016	5	19
2016-12-05 09:00:00	2016-05-12	09:00:00	24.026	2016	5	19
2016-12-05 10:00:00	2016-05-12	10:00:00	23.954	2016	5	19
2016-12-05 11:00:00	2016-05-12	11:00:00	24.219	2016	5	19
2016-12-05 12:00:00	2016-05-12	12:00:00	24.243	2016	5	19
2016-12-05 13:00:00	2016-05-12	13:00:00	24.195	2016	5	19
2016-12-05 14:00:00	2016-05-12	14:00:00	24.388	2016	5	19
2016-12-05 15:00:00	2016-05-12	15:00:00	24.605	2016	5	19
2016-12-05 16:00:00	2016-05-12	16:00:00	24.798	2016	5	19
2016-12-05 17:00:00	2016-05-12	17:00:00	24.895	2016	5	19
2016-12-05 18:00:00	2016-05-12	18:00:00	24.823	2016	5	19
2016-12-05 19:00:00	2016-05-12	19:00:00	24.75	2016	5	19
2016-12-05 20:00:00	2016-05-12	20:00:00	24.581	2016	5	19
2016-12-05 21:00:00	2016-05-12	21:00:00	24.484	2016	5	19
2016-12-05 22:00:00	2016-05-12	22:00:00	24.484	2016	5	19
2016-12-05 23:00:00	2016-05-12	23:00:00	24.46	2016	5	19
5/13/2016 0:00	2016-05-13	00:00:00	24.46	2016	5	19
5/13/2016 1:00	2016-05-13	01:00:00	24.46	2016	5	19
5/13/2016 2:00	2016-05-13	02:00:00	24.436	2016	5	19
5/13/2016 3:00	2016-05-13	03:00:00	24.412	2016	5	19
5/13/2016 4:00	2016-05-13	04:00:00	24.388	2016	5	19
5/13/2016 5:00	2016-05-13	05:00:00	24.363	2016	5	19
5/13/2016 6:00	2016-05-13	06:00:00	24.315	2016	5	19
5/13/2016 7:00	2016-05-13	07:00:00	24.363	2016	5	19
5/13/2016 8:00	2016-05-13	08:00:00	24.46	2016	5	19
5/13/2016 9:00	2016-05-13	09:00:00	24.532	2016	5	19
5/13/2016 10:00	2016-05-13	10:00:00	24.774	2016	5	19
5/13/2016 11:00	2016-05-13	11:00:00	24.847	2016	5	19
5/13/2016 12:00	2016-05-13	12:00:00	25.065	2016	5	19
5/13/2016 13:00	2016-05-13	13:00:00	25.404	2016	5	19
5/13/2016 14:00	2016-05-13	14:00:00	25.307	2016	5	19
5/13/2016 15:00	2016-05-13	15:00:00	25.501	2016	5	19
5/13/2016 16:00	2016-05-13	16:00:00	25.355	2016	5	19
5/13/2016 17:00	2016-05-13	17:00:00	25.72	2016	5	19
5/13/2016 18:00	2016-05-13	18:00:00	25.501	2016	5	19
5/13/2016 19:00	2016-05-13	19:00:00	25.234	2016	5	19
5/13/2016 20:00	2016-05-13	20:00:00	24.944	2016	5	19
5/13/2016 21:00	2016-05-13	21:00:00	24.774	2016	5	19
5/13/2016 22:00	2016-05-13	22:00:00	24.581	2016	5	19
5/13/2016 23:00	2016-05-13	23:00:00	24.557	2016	5	19
5/14/2016 0:00	2016-05-14	00:00:00	24.508	2016	5	19
5/14/2016 1:00	2016-05-14	01:00:00	24.508	2016	5	19
5/14/2016 2:00	2016-05-14	02:00:00	24.363	2016	5	19
5/14/2016 3:00	2016-05-14	03:00:00	24.074	2016	5	19
5/14/2016 4:00	2016-05-14	04:00:00	24.122	2016	5	19
5/14/2016 5:00	2016-05-14	05:00:00	24.171	2016	5	19
5/14/2016 6:00	2016-05-14	06:00:00	24.146	2016	5	19
5/14/2016 7:00	2016-05-14	07:00:00	24.171	2016	5	19
5/14/2016 8:00	2016-05-14	08:00:00	24.267	2016	5	19
5/14/2016 9:00	2016-05-14	09:00:00	24.557	2016	5	19
5/14/2016 10:00	2016-05-14	10:00:00	24.968	2016	5	19
5/14/2016 11:00	2016-05-14	11:00:00	25.331	2016	5	19
5/14/2016 12:00	2016-05-14	12:00:00	25.477	2016	5	19
5/14/2016 13:00	2016-05-14	13:00:00	25.477	2016	5	19
5/14/2016 14:00	2016-05-14	14:00:00	25.453	2016	5	19
5/14/2016 15:00	2016-05-14	15:00:00	25.914	2016	5	19
5/14/2016 16:00	2016-05-14	16:00:00	26.378	2016	5	19
5/14/2016 17:00	2016-05-14	17:00:00	26.061	2016	5	19
5/14/2016 18:00	2016-05-14	18:00:00	26.304	2016	5	19
5/14/2016 19:00	2016-05-14	19:00:00	26.158	2016	5	19
5/14/2016 20:00	2016-05-14	20:00:00	25.914	2016	5	19
5/14/2016 21:00	2016-05-14	21:00:00	25.477	2016	5	19
5/14/2016 22:00	2016-05-14	22:00:00	25.501	2016	5	19
5/14/2016 23:00	2016-05-14	23:00:00	25.21	2016	5	19
5/15/2016 0:00	2016-05-15	00:00:00	25.38	2016	5	20
5/15/2016 1:00	2016-05-15	01:00:00	25.331	2016	5	20
5/15/2016 2:00	2016-05-15	02:00:00	25.283	2016	5	20
5/15/2016 3:00	2016-05-15	03:00:00	25.234	2016	5	20
5/15/2016 4:00	2016-05-15	04:00:00	25.162	2016	5	20
5/15/2016 5:00	2016-05-15	05:00:00	25.089	2016	5	20
5/15/2016 6:00	2016-05-15	06:00:00	25.065	2016	5	20
5/15/2016 7:00	2016-05-15	07:00:00	25.113	2016	5	20
5/15/2016 8:00	2016-05-15	08:00:00	25.234	2016	5	20
5/15/2016 9:00	2016-05-15	09:00:00	25.453	2016	5	20
5/15/2016 10:00	2016-05-15	10:00:00	25.817	2016	5	20
5/15/2016 11:00	2016-05-15	11:00:00	26.061	2016	5	20
5/15/2016 12:00	2016-05-15	12:00:00	26.426	2016	5	20
5/15/2016 13:00	2016-05-15	13:00:00	26.061	2016	5	20
5/15/2016 14:00	2016-05-15	14:00:00	26.158	2016	5	20
5/15/2016 15:00	2016-05-15	15:00:00	25.914	2016	5	20
5/15/2016 16:00	2016-05-15	16:00:00	26.036	2016	5	20
5/15/2016 17:00	2016-05-15	17:00:00	26.426	2016	5	20
5/15/2016 18:00	2016-05-15	18:00:00	26.524	2016	5	20
5/15/2016 19:00	2016-05-15	19:00:00	26.475	2016	5	20
5/15/2016 20:00	2016-05-15	20:00:00	26.573	2016	5	20
5/15/2016 21:00	2016-05-15	21:00:00	26.426	2016	5	20
5/15/2016 22:00	2016-05-15	22:00:00	26.207	2016	5	20
5/15/2016 23:00	2016-05-15	23:00:00	26.036	2016	5	20
5/16/2016 0:00	2016-05-16	00:00:00	25.866	2016	5	20
5/16/2016 1:00	2016-05-16	01:00:00	25.768	2016	5	20
5/16/2016 2:00	2016-05-16	02:00:00	25.623	2016	5	20
5/16/2016 3:00	2016-05-16	03:00:00	25.574	2016	5	20
5/16/2016 4:00	2016-05-16	04:00:00	25.477	2016	5	20
5/16/2016 5:00	2016-05-16	05:00:00	25.453	2016	5	20
5/16/2016 6:00	2016-05-16	06:00:00	25.404	2016	5	20
5/16/2016 7:00	2016-05-16	07:00:00	25.453	2016	5	20
5/16/2016 8:00	2016-05-16	08:00:00	25.598	2016	5	20
5/16/2016 9:00	2016-05-16	09:00:00	25.817	2016	5	20
5/16/2016 10:00	2016-05-16	10:00:00	26.109	2016	5	20
5/16/2016 11:00	2016-05-16	11:00:00	26.182	2016	5	20
5/16/2016 12:00	2016-05-16	12:00:00	25.744	2016	5	20
5/16/2016 13:00	2016-05-16	13:00:00	25.841	2016	5	20
5/16/2016 14:00	2016-05-16	14:00:00	25.574	2016	5	20
5/16/2016 15:00	2016-05-16	15:00:00	25.477	2016	5	20
5/16/2016 16:00	2016-05-16	16:00:00	25.453	2016	5	20
5/16/2016 17:00	2016-05-16	17:00:00	25.04	2016	5	20
5/16/2016 18:00	2016-05-16	18:00:00	25.04	2016	5	20
5/16/2016 19:00	2016-05-16	19:00:00	24.968	2016	5	20
5/16/2016 20:00	2016-05-16	20:00:00	24.895	2016	5	20
5/16/2016 21:00	2016-05-16	21:00:00	24.702	2016	5	20
5/16/2016 22:00	2016-05-16	22:00:00	24.363	2016	5	20
5/16/2016 23:00	2016-05-16	23:00:00	24.219	2016	5	20
5/17/2016 0:00	2016-05-17	00:00:00	24.267	2016	5	20
5/17/2016 1:00	2016-05-17	01:00:00	24.243	2016	5	20
5/17/2016 2:00	2016-05-17	02:00:00	24.146	2016	5	20
5/17/2016 3:00	2016-05-17	03:00:00	24.267	2016	5	20
5/17/2016 4:00	2016-05-17	04:00:00	24.315	2016	5	20
5/17/2016 5:00	2016-05-17	05:00:00	24.291	2016	5	20
5/17/2016 6:00	2016-05-17	06:00:00	24.195	2016	5	20
5/17/2016 7:00	2016-05-17	07:00:00	24.074	2016	5	20
5/17/2016 8:00	2016-05-17	08:00:00	23.954	2016	5	20
5/17/2016 9:00	2016-05-17	09:00:00	23.833	2016	5	20
5/17/2016 10:00	2016-05-17	10:00:00	23.713	2016	5	20
5/17/2016 11:00	2016-05-17	11:00:00	23.545	2016	5	20
5/17/2016 12:00	2016-05-17	12:00:00	23.617	2016	5	20
5/17/2016 13:00	2016-05-17	13:00:00	23.569	2016	5	20
5/17/2016 14:00	2016-05-17	14:00:00	23.448	2016	5	20
5/17/2016 15:00	2016-05-17	15:00:00	23.497	2016	5	20
5/17/2016 16:00	2016-05-17	16:00:00	23.593	2016	5	20
5/17/2016 17:00	2016-05-17	17:00:00	23.593	2016	5	20
5/17/2016 18:00	2016-05-17	18:00:00	23.569	2016	5	20
5/17/2016 19:00	2016-05-17	19:00:00	23.497	2016	5	20
5/17/2016 20:00	2016-05-17	20:00:00	23.424	2016	5	20
5/17/2016 21:00	2016-05-17	21:00:00	23.328	2016	5	20
5/17/2016 22:00	2016-05-17	22:00:00	23.208	2016	5	20
5/17/2016 23:00	2016-05-17	23:00:00	23.112	2016	5	20
5/18/2016 0:00	2016-05-18	00:00:00	23.352	2016	5	20
5/18/2016 1:00	2016-05-18	01:00:00	23.256	2016	5	20
5/18/2016 2:00	2016-05-18	02:00:00	23.352	2016	5	20
5/18/2016 3:00	2016-05-18	03:00:00	23.545	2016	5	20
5/18/2016 4:00	2016-05-18	04:00:00	23.545	2016	5	20
5/18/2016 5:00	2016-05-18	05:00:00	23.472	2016	5	20
5/18/2016 6:00	2016-05-18	06:00:00	23.448	2016	5	20
5/18/2016 7:00	2016-05-18	07:00:00	23.376	2016	5	20
5/18/2016 8:00	2016-05-18	08:00:00	23.352	2016	5	20
5/18/2016 9:00	2016-05-18	09:00:00	23.16	2016	5	20
5/18/2016 10:00	2016-05-18	10:00:00	23.28	2016	5	20
5/18/2016 11:00	2016-05-18	11:00:00	23.328	2016	5	20
5/18/2016 12:00	2016-05-18	12:00:00	24.05	2016	5	20
5/18/2016 13:00	2016-05-18	13:00:00	24.098	2016	5	20
5/18/2016 14:00	2016-05-18	14:00:00	24.098	2016	5	20
5/18/2016 15:00	2016-05-18	15:00:00	24.002	2016	5	20
5/18/2016 16:00	2016-05-18	16:00:00	24.026	2016	5	20
5/18/2016 17:00	2016-05-18	17:00:00	24.002	2016	5	20
5/18/2016 18:00	2016-05-18	18:00:00	23.978	2016	5	20
5/18/2016 19:00	2016-05-18	19:00:00	23.905	2016	5	20
5/18/2016 20:00	2016-05-18	20:00:00	23.857	2016	5	20
5/18/2016 21:00	2016-05-18	21:00:00	23.857	2016	5	20
5/18/2016 22:00	2016-05-18	22:00:00	23.833	2016	5	20
5/18/2016 23:00	2016-05-18	23:00:00	23.833	2016	5	20
5/19/2016 0:00	2016-05-19	00:00:00	23.809	2016	5	20
5/19/2016 1:00	2016-05-19	01:00:00	23.737	2016	5	20
5/19/2016 2:00	2016-05-19	02:00:00	23.737	2016	5	20
5/19/2016 3:00	2016-05-19	03:00:00	23.761	2016	5	20
5/19/2016 4:00	2016-05-19	04:00:00	23.737	2016	5	20
5/19/2016 5:00	2016-05-19	05:00:00	23.737	2016	5	20
5/19/2016 6:00	2016-05-19	06:00:00	23.737	2016	5	20
5/19/2016 7:00	2016-05-19	07:00:00	23.617	2016	5	20
5/19/2016 8:00	2016-05-19	08:00:00	23.737	2016	5	20
5/19/2016 9:00	2016-05-19	09:00:00	23.809	2016	5	20
5/19/2016 10:00	2016-05-19	10:00:00	23.978	2016	5	20
5/19/2016 11:00	2016-05-19	11:00:00	24.098	2016	5	20
5/19/2016 12:00	2016-05-19	12:00:00	24.291	2016	5	20
5/19/2016 13:00	2016-05-19	13:00:00	24.412	2016	5	20
5/19/2016 14:00	2016-05-19	14:00:00	24.46	2016	5	20
5/19/2016 15:00	2016-05-19	15:00:00	24.291	2016	5	20
5/19/2016 16:00	2016-05-19	16:00:00	24.146	2016	5	20
5/19/2016 17:00	2016-05-19	17:00:00	24.146	2016	5	20
5/19/2016 18:00	2016-05-19	18:00:00	24.146	2016	5	20
5/19/2016 19:00	2016-05-19	19:00:00	24.026	2016	5	20
5/19/2016 20:00	2016-05-19	20:00:00	23.954	2016	5	20
5/19/2016 21:00	2016-05-19	21:00:00	24.122	2016	5	20
5/19/2016 22:00	2016-05-19	22:00:00	24.146	2016	5	20
5/19/2016 23:00	2016-05-19	23:00:00	24.146	2016	5	20
5/20/2016 0:00	2016-05-20	00:00:00	24.171	2016	5	20
5/20/2016 1:00	2016-05-20	01:00:00	24.074	2016	5	20
5/20/2016 2:00	2016-05-20	02:00:00	24.074	2016	5	20
5/20/2016 3:00	2016-05-20	03:00:00	24.002	2016	5	20
5/20/2016 4:00	2016-05-20	04:00:00	23.93	2016	5	20
5/20/2016 5:00	2016-05-20	05:00:00	23.93	2016	5	20
5/20/2016 6:00	2016-05-20	06:00:00	23.881	2016	5	20
5/20/2016 7:00	2016-05-20	07:00:00	23.93	2016	5	20
5/20/2016 8:00	2016-05-20	08:00:00	24.098	2016	5	20
5/20/2016 9:00	2016-05-20	09:00:00	24.291	2016	5	20
5/20/2016 10:00	2016-05-20	10:00:00	24.629	2016	5	20
5/20/2016 11:00	2016-05-20	11:00:00	24.798	2016	5	20
5/20/2016 12:00	2016-05-20	12:00:00	25.768	2016	5	20
5/20/2016 13:00	2016-05-20	13:00:00	25.841	2016	5	20
5/20/2016 14:00	2016-05-20	14:00:00	25.501	2016	5	20
5/20/2016 15:00	2016-05-20	15:00:00	24.992	2016	5	20
5/20/2016 16:00	2016-05-20	16:00:00	24.339	2016	5	20
5/20/2016 17:00	2016-05-20	17:00:00	24.315	2016	5	20
5/20/2016 18:00	2016-05-20	18:00:00	24.146	2016	5	20
5/20/2016 19:00	2016-05-20	19:00:00	24.098	2016	5	20
5/20/2016 20:00	2016-05-20	20:00:00	24.171	2016	5	20
5/20/2016 21:00	2016-05-20	21:00:00	24.195	2016	5	20
5/20/2016 22:00	2016-05-20	22:00:00	23.93	2016	5	20
5/20/2016 23:00	2016-05-20	23:00:00	24.074	2016	5	20
5/21/2016 0:00	2016-05-21	00:00:00	24.122	2016	5	20
5/21/2016 1:00	2016-05-21	01:00:00	24.267	2016	5	20
5/21/2016 2:00	2016-05-21	02:00:00	24.339	2016	5	20
5/21/2016 3:00	2016-05-21	03:00:00	24.339	2016	5	20
5/21/2016 4:00	2016-05-21	04:00:00	24.363	2016	5	20
5/21/2016 5:00	2016-05-21	05:00:00	23.954	2016	5	20
5/21/2016 6:00	2016-05-21	06:00:00	23.881	2016	5	20
5/21/2016 7:00	2016-05-21	07:00:00	23.905	2016	5	20
5/21/2016 8:00	2016-05-21	08:00:00	23.954	2016	5	20
5/21/2016 9:00	2016-05-21	09:00:00	24.026	2016	5	20
5/21/2016 10:00	2016-05-21	10:00:00	24.291	2016	5	20
5/21/2016 11:00	2016-05-21	11:00:00	24.436	2016	5	20
5/21/2016 12:00	2016-05-21	12:00:00	25.404	2016	5	20
5/21/2016 13:00	2016-05-21	13:00:00	25.307	2016	5	20
5/21/2016 14:00	2016-05-21	14:00:00	24.919	2016	5	20
5/21/2016 15:00	2016-05-21	15:00:00	24.412	2016	5	20
5/21/2016 16:00	2016-05-21	16:00:00	24.074	2016	5	20
5/21/2016 17:00	2016-05-21	17:00:00	24.243	2016	5	20
5/21/2016 18:00	2016-05-21	18:00:00	24.122	2016	5	20
5/21/2016 19:00	2016-05-21	19:00:00	24.002	2016	5	20
5/21/2016 20:00	2016-05-21	20:00:00	24.074	2016	5	20
5/21/2016 21:00	2016-05-21	21:00:00	24.002	2016	5	20
5/21/2016 22:00	2016-05-21	22:00:00	23.905	2016	5	20
5/21/2016 23:00	2016-05-21	23:00:00	23.833	2016	5	20
5/22/2016 0:00	2016-05-22	00:00:00	23.93	2016	5	21
5/22/2016 1:00	2016-05-22	01:00:00	24.026	2016	5	21
5/22/2016 2:00	2016-05-22	02:00:00	24.026	2016	5	21
5/22/2016 3:00	2016-05-22	03:00:00	24.098	2016	5	21
5/22/2016 4:00	2016-05-22	04:00:00	24.122	2016	5	21
5/22/2016 5:00	2016-05-22	05:00:00	24.243	2016	5	21
5/22/2016 6:00	2016-05-22	06:00:00	24.243	2016	5	21
5/22/2016 7:00	2016-05-22	07:00:00	24.243	2016	5	21
5/22/2016 8:00	2016-05-22	08:00:00	24.267	2016	5	21
5/22/2016 9:00	2016-05-22	09:00:00	24.291	2016	5	21
5/22/2016 10:00	2016-05-22	10:00:00	24.339	2016	5	21
5/22/2016 11:00	2016-05-22	11:00:00	24.388	2016	5	21
5/22/2016 12:00	2016-05-22	12:00:00	24.484	2016	5	21
5/22/2016 13:00	2016-05-22	13:00:00	24.702	2016	5	21
5/22/2016 14:00	2016-05-22	14:00:00	24.871	2016	5	21
5/22/2016 15:00	2016-05-22	15:00:00	24.919	2016	5	21
5/22/2016 16:00	2016-05-22	16:00:00	24.919	2016	5	21
5/22/2016 17:00	2016-05-22	17:00:00	24.823	2016	5	21
5/22/2016 18:00	2016-05-22	18:00:00	24.702	2016	5	21
5/22/2016 19:00	2016-05-22	19:00:00	24.629	2016	5	21
5/22/2016 20:00	2016-05-22	20:00:00	24.557	2016	5	21
5/22/2016 21:00	2016-05-22	21:00:00	24.557	2016	5	21
5/22/2016 22:00	2016-05-22	22:00:00	24.557	2016	5	21
5/22/2016 23:00	2016-05-22	23:00:00	24.557	2016	5	21
5/23/2016 0:00	2016-05-23	00:00:00	24.557	2016	5	21
5/23/2016 1:00	2016-05-23	01:00:00	24.508	2016	5	21
5/23/2016 2:00	2016-05-23	02:00:00	24.508	2016	5	21
5/23/2016 3:00	2016-05-23	03:00:00	24.532	2016	5	21
5/23/2016 4:00	2016-05-23	04:00:00	24.532	2016	5	21
5/23/2016 5:00	2016-05-23	05:00:00	24.484	2016	5	21
5/23/2016 6:00	2016-05-23	06:00:00	24.484	2016	5	21
5/23/2016 7:00	2016-05-23	07:00:00	24.508	2016	5	21
5/23/2016 8:00	2016-05-23	08:00:00	24.557	2016	5	21
5/23/2016 9:00	2016-05-23	09:00:00	24.557	2016	5	21
5/23/2016 10:00	2016-05-23	10:00:00	24.823	2016	5	21
5/23/2016 11:00	2016-05-23	11:00:00	25.234	2016	5	21
5/23/2016 12:00	2016-05-23	12:00:00	25.939	2016	5	21
5/23/2016 13:00	2016-05-23	13:00:00	26.353	2016	5	21
5/23/2016 14:00	2016-05-23	14:00:00	25.914	2016	5	21
5/23/2016 15:00	2016-05-23	15:00:00	25.453	2016	5	21
5/23/2016 16:00	2016-05-23	16:00:00	25.258	2016	5	21
5/23/2016 17:00	2016-05-23	17:00:00	25.283	2016	5	21
5/23/2016 18:00	2016-05-23	18:00:00	25.186	2016	5	21
5/23/2016 19:00	2016-05-23	19:00:00	24.992	2016	5	21
5/23/2016 20:00	2016-05-23	20:00:00	24.895	2016	5	21
5/23/2016 21:00	2016-05-23	21:00:00	24.823	2016	5	21
5/23/2016 22:00	2016-05-23	22:00:00	24.847	2016	5	21
5/23/2016 23:00	2016-05-23	23:00:00	24.823	2016	5	21
5/24/2016 0:00	2016-05-24	00:00:00	24.847	2016	5	21
5/24/2016 1:00	2016-05-24	01:00:00	24.895	2016	5	21
5/24/2016 2:00	2016-05-24	02:00:00	24.895	2016	5	21
5/24/2016 3:00	2016-05-24	03:00:00	24.919	2016	5	21
5/24/2016 4:00	2016-05-24	04:00:00	24.919	2016	5	21
5/24/2016 5:00	2016-05-24	05:00:00	24.871	2016	5	21
5/24/2016 6:00	2016-05-24	06:00:00	24.919	2016	5	21
5/24/2016 7:00	2016-05-24	07:00:00	25.016	2016	5	21
5/24/2016 8:00	2016-05-24	08:00:00	25.089	2016	5	21
5/24/2016 9:00	2016-05-24	09:00:00	25.04	2016	5	21
5/24/2016 10:00	2016-05-24	10:00:00	24.944	2016	5	21
5/24/2016 11:00	2016-05-24	11:00:00	25.501	2016	5	21
5/24/2016 12:00	2016-05-24	12:00:00	25.89	2016	5	21
5/24/2016 13:00	2016-05-24	13:00:00	25.89	2016	5	21
5/24/2016 14:00	2016-05-24	14:00:00	26.475	2016	5	21
5/24/2016 15:00	2016-05-24	15:00:00	26.378	2016	5	21
5/24/2016 16:00	2016-05-24	16:00:00	25.793	2016	5	21
5/24/2016 17:00	2016-05-24	17:00:00	25.817	2016	5	21
5/24/2016 18:00	2016-05-24	18:00:00	25.477	2016	5	21
5/24/2016 19:00	2016-05-24	19:00:00	25.355	2016	5	21
5/24/2016 20:00	2016-05-24	20:00:00	25.137	2016	5	21
5/24/2016 21:00	2016-05-24	21:00:00	24.895	2016	5	21
5/24/2016 22:00	2016-05-24	22:00:00	25.016	2016	5	21
5/24/2016 23:00	2016-05-24	23:00:00	24.726	2016	5	21
5/25/2016 0:00	2016-05-25	00:00:00	24.823	2016	5	21
5/25/2016 1:00	2016-05-25	01:00:00	24.919	2016	5	21
5/25/2016 2:00	2016-05-25	02:00:00	25.016	2016	5	21
5/25/2016 3:00	2016-05-25	03:00:00	25.016	2016	5	21
5/25/2016 4:00	2016-05-25	04:00:00	24.992	2016	5	21
5/25/2016 5:00	2016-05-25	05:00:00	25.016	2016	5	21
5/25/2016 6:00	2016-05-25	06:00:00	25.04	2016	5	21
5/25/2016 7:00	2016-05-25	07:00:00	24.992	2016	5	21
5/25/2016 8:00	2016-05-25	08:00:00	25.065	2016	5	21
5/25/2016 9:00	2016-05-25	09:00:00	24.992	2016	5	21
5/25/2016 10:00	2016-05-25	10:00:00	25.162	2016	5	21
5/25/2016 11:00	2016-05-25	11:00:00	25.283	2016	5	21
5/25/2016 12:00	2016-05-25	12:00:00	25.404	2016	5	21
5/25/2016 13:00	2016-05-25	13:00:00	25.525	2016	5	21
5/25/2016 14:00	2016-05-25	14:00:00	25.623	2016	5	21
5/25/2016 15:00	2016-05-25	15:00:00	25.841	2016	5	21
5/25/2016 16:00	2016-05-25	16:00:00	25.914	2016	5	21
5/25/2016 17:00	2016-05-25	17:00:00	25.55	2016	5	21
5/25/2016 18:00	2016-05-25	18:00:00	25.355	2016	5	21
5/25/2016 19:00	2016-05-25	19:00:00	25.38	2016	5	21
5/25/2016 20:00	2016-05-25	20:00:00	25.38	2016	5	21
5/25/2016 21:00	2016-05-25	21:00:00	25.307	2016	5	21
5/25/2016 22:00	2016-05-25	22:00:00	25.089	2016	5	21
5/25/2016 23:00	2016-05-25	23:00:00	24.992	2016	5	21
5/26/2016 0:00	2016-05-26	00:00:00	25.113	2016	5	21
5/26/2016 1:00	2016-05-26	01:00:00	25.162	2016	5	21
5/26/2016 2:00	2016-05-26	02:00:00	25.162	2016	5	21
5/26/2016 3:00	2016-05-26	03:00:00	25.04	2016	5	21
5/26/2016 4:00	2016-05-26	04:00:00	25.089	2016	5	21
5/26/2016 5:00	2016-05-26	05:00:00	25.137	2016	5	21
5/26/2016 6:00	2016-05-26	06:00:00	25.186	2016	5	21
5/26/2016 7:00	2016-05-26	07:00:00	25.113	2016	5	21
5/26/2016 8:00	2016-05-26	08:00:00	25.137	2016	5	21
5/26/2016 9:00	2016-05-26	09:00:00	25.21	2016	5	21
5/26/2016 10:00	2016-05-26	10:00:00	25.089	2016	5	21
5/26/2016 11:00	2016-05-26	11:00:00	25.04	2016	5	21
5/26/2016 12:00	2016-05-26	12:00:00	24.992	2016	5	21
5/26/2016 13:00	2016-05-26	13:00:00	25.283	2016	5	21
5/26/2016 14:00	2016-05-26	14:00:00	25.065	2016	5	21
5/26/2016 15:00	2016-05-26	15:00:00	25.21	2016	5	21
5/26/2016 16:00	2016-05-26	16:00:00	25.331	2016	5	21
5/26/2016 17:00	2016-05-26	17:00:00	25.598	2016	5	21
5/26/2016 18:00	2016-05-26	18:00:00	25.258	2016	5	21
5/26/2016 19:00	2016-05-26	19:00:00	25.162	2016	5	21
5/26/2016 20:00	2016-05-26	20:00:00	25.113	2016	5	21
5/26/2016 21:00	2016-05-26	21:00:00	25.016	2016	5	21
5/26/2016 22:00	2016-05-26	22:00:00	25.016	2016	5	21
5/26/2016 23:00	2016-05-26	23:00:00	24.992	2016	5	21
5/27/2016 0:00	2016-05-27	00:00:00	24.774	2016	5	21
5/27/2016 1:00	2016-05-27	01:00:00	24.847	2016	5	21
5/27/2016 2:00	2016-05-27	02:00:00	24.919	2016	5	21
5/27/2016 3:00	2016-05-27	03:00:00	24.847	2016	5	21
5/27/2016 4:00	2016-05-27	04:00:00	24.944	2016	5	21
5/27/2016 5:00	2016-05-27	05:00:00	24.847	2016	5	21
5/27/2016 6:00	2016-05-27	06:00:00	24.944	2016	5	21
5/27/2016 7:00	2016-05-27	07:00:00	24.895	2016	5	21
5/27/2016 8:00	2016-05-27	08:00:00	25.065	2016	5	21
5/27/2016 9:00	2016-05-27	09:00:00	25.137	2016	5	21
5/27/2016 10:00	2016-05-27	10:00:00	25.283	2016	5	21
5/27/2016 11:00	2016-05-27	11:00:00	25.04	2016	5	21
5/27/2016 12:00	2016-05-27	12:00:00	25.21	2016	5	21
5/27/2016 13:00	2016-05-27	13:00:00	25.453	2016	5	21
5/27/2016 14:00	2016-05-27	14:00:00	25.793	2016	5	21
5/27/2016 15:00	2016-05-27	15:00:00	25.744	2016	5	21
5/27/2016 16:00	2016-05-27	16:00:00	26.231	2016	5	21
5/27/2016 17:00	2016-05-27	17:00:00	26.353	2016	5	21
5/27/2016 18:00	2016-05-27	18:00:00	25.768	2016	5	21
5/27/2016 19:00	2016-05-27	19:00:00	26.036	2016	5	21
5/27/2016 20:00	2016-05-27	20:00:00	25.866	2016	5	21
5/27/2016 21:00	2016-05-27	21:00:00	25.525	2016	5	21
5/27/2016 22:00	2016-05-27	22:00:00	25.355	2016	5	21
5/27/2016 23:00	2016-05-27	23:00:00	25.331	2016	5	21
5/28/2016 0:00	2016-05-28	00:00:00	25.404	2016	5	21
5/28/2016 1:00	2016-05-28	01:00:00	25.453	2016	5	21
5/28/2016 2:00	2016-05-28	02:00:00	25.477	2016	5	21
5/28/2016 3:00	2016-05-28	03:00:00	25.453	2016	5	21
5/28/2016 4:00	2016-05-28	04:00:00	25.428	2016	5	21
5/28/2016 5:00	2016-05-28	05:00:00	25.428	2016	5	21
5/28/2016 6:00	2016-05-28	06:00:00	25.428	2016	5	21
5/28/2016 7:00	2016-05-28	07:00:00	25.501	2016	5	21
5/28/2016 8:00	2016-05-28	08:00:00	25.72	2016	5	21
5/28/2016 9:00	2016-05-28	09:00:00	25.866	2016	5	21
5/28/2016 10:00	2016-05-28	10:00:00	25.987	2016	5	21
5/28/2016 11:00	2016-05-28	11:00:00	25.987	2016	5	21
5/28/2016 12:00	2016-05-28	12:00:00	25.939	2016	5	21
5/28/2016 13:00	2016-05-28	13:00:00	26.036	2016	5	21
5/28/2016 14:00	2016-05-28	14:00:00	26.989	2016	5	21
5/28/2016 15:00	2016-05-28	15:00:00	27.333	2016	5	21
5/28/2016 16:00	2016-05-28	16:00:00	27.21	2016	5	21
5/28/2016 17:00	2016-05-28	17:00:00	27.579	2016	5	21
5/28/2016 18:00	2016-05-28	18:00:00	27.604	2016	5	21
5/28/2016 19:00	2016-05-28	19:00:00	27.308	2016	5	21
5/28/2016 20:00	2016-05-28	20:00:00	27.014	2016	5	21
5/28/2016 21:00	2016-05-28	21:00:00	26.402	2016	5	21
5/28/2016 22:00	2016-05-28	22:00:00	25.939	2016	5	21
5/28/2016 23:00	2016-05-28	23:00:00	25.866	2016	5	21
5/29/2016 0:00	2016-05-29	00:00:00	25.817	2016	5	22
5/29/2016 1:00	2016-05-29	01:00:00	25.939	2016	5	22
5/29/2016 2:00	2016-05-29	02:00:00	25.939	2016	5	22
5/29/2016 3:00	2016-05-29	03:00:00	25.939	2016	5	22
5/29/2016 4:00	2016-05-29	04:00:00	25.939	2016	5	22
5/29/2016 5:00	2016-05-29	05:00:00	25.841	2016	5	22
5/29/2016 6:00	2016-05-29	06:00:00	25.866	2016	5	22
5/29/2016 7:00	2016-05-29	07:00:00	26.085	2016	5	22
5/29/2016 8:00	2016-05-29	08:00:00	26.061	2016	5	22
5/29/2016 9:00	2016-05-29	09:00:00	26.182	2016	5	22
5/29/2016 10:00	2016-05-29	10:00:00	26.549	2016	5	22
5/29/2016 11:00	2016-05-29	11:00:00	26.451	2016	5	22
5/29/2016 12:00	2016-05-29	12:00:00	26.549	2016	5	22
5/29/2016 13:00	2016-05-29	13:00:00	27.063	2016	5	22
5/29/2016 14:00	2016-05-29	14:00:00	26.891	2016	5	22
5/29/2016 15:00	2016-05-29	15:00:00	27.235	2016	5	22
5/29/2016 16:00	2016-05-29	16:00:00	27.014	2016	5	22
5/29/2016 17:00	2016-05-29	17:00:00	27.259	2016	5	22
5/29/2016 18:00	2016-05-29	18:00:00	27.161	2016	5	22
5/29/2016 19:00	2016-05-29	19:00:00	26.891	2016	5	22
5/29/2016 20:00	2016-05-29	20:00:00	26.695	2016	5	22
5/29/2016 21:00	2016-05-29	21:00:00	26.426	2016	5	22
5/29/2016 22:00	2016-05-29	22:00:00	26.378	2016	5	22
5/29/2016 23:00	2016-05-29	23:00:00	26.353	2016	5	22
5/30/2016 0:00	2016-05-30	00:00:00	26.353	2016	5	22
5/30/2016 1:00	2016-05-30	01:00:00	26.353	2016	5	22
5/30/2016 2:00	2016-05-30	02:00:00	26.353	2016	5	22
5/30/2016 3:00	2016-05-30	03:00:00	26.451	2016	5	22
5/30/2016 4:00	2016-05-30	04:00:00	26.524	2016	5	22
5/30/2016 5:00	2016-05-30	05:00:00	26.378	2016	5	22
5/30/2016 6:00	2016-05-30	06:00:00	26.353	2016	5	22
5/30/2016 7:00	2016-05-30	07:00:00	26.353	2016	5	22
5/30/2016 8:00	2016-05-30	08:00:00	26.378	2016	5	22
5/30/2016 9:00	2016-05-30	09:00:00	26.402	2016	5	22
5/30/2016 10:00	2016-05-30	10:00:00	26.598	2016	5	22
5/30/2016 11:00	2016-05-30	11:00:00	26.695	2016	5	22
5/30/2016 12:00	2016-05-30	12:00:00	26.744	2016	5	22
5/30/2016 13:00	2016-05-30	13:00:00	26.916	2016	5	22
5/30/2016 14:00	2016-05-30	14:00:00	27.038	2016	5	22
5/30/2016 15:00	2016-05-30	15:00:00	27.087	2016	5	22
5/30/2016 16:00	2016-05-30	16:00:00	26.793	2016	5	22
5/30/2016 17:00	2016-05-30	17:00:00	26.744	2016	5	22
5/30/2016 18:00	2016-05-30	18:00:00	26.793	2016	5	22
5/30/2016 19:00	2016-05-30	19:00:00	26.818	2016	5	22
5/30/2016 20:00	2016-05-30	20:00:00	26.695	2016	5	22
5/30/2016 21:00	2016-05-30	21:00:00	26.622	2016	5	22
5/30/2016 22:00	2016-05-30	22:00:00	26.451	2016	5	22
5/30/2016 23:00	2016-05-30	23:00:00	26.353	2016	5	22
5/31/2016 0:00	2016-05-31	00:00:00	26.353	2016	5	22
5/31/2016 1:00	2016-05-31	01:00:00	26.329	2016	5	22
5/31/2016 2:00	2016-05-31	02:00:00	26.329	2016	5	22
5/31/2016 3:00	2016-05-31	03:00:00	26.402	2016	5	22
5/31/2016 4:00	2016-05-31	04:00:00	26.378	2016	5	22
5/31/2016 5:00	2016-05-31	05:00:00	26.353	2016	5	22
5/31/2016 6:00	2016-05-31	06:00:00	26.329	2016	5	22
5/31/2016 7:00	2016-05-31	07:00:00	26.304	2016	5	22
5/31/2016 8:00	2016-05-31	08:00:00	26.353	2016	5	22
5/31/2016 9:00	2016-05-31	09:00:00	26.378	2016	5	22
5/31/2016 10:00	2016-05-31	10:00:00	26.353	2016	5	22
5/31/2016 11:00	2016-05-31	11:00:00	26.353	2016	5	22
5/31/2016 12:00	2016-05-31	12:00:00	26.622	2016	5	22
5/31/2016 13:00	2016-05-31	13:00:00	26.793	2016	5	22
5/31/2016 14:00	2016-05-31	14:00:00	26.965	2016	5	22
5/31/2016 15:00	2016-05-31	15:00:00	27.136	2016	5	22
5/31/2016 16:00	2016-05-31	16:00:00	26.989	2016	5	22
5/31/2016 17:00	2016-05-31	17:00:00	26.891	2016	5	22
5/31/2016 18:00	2016-05-31	18:00:00	26.818	2016	5	22
5/31/2016 19:00	2016-05-31	19:00:00	26.598	2016	5	22
5/31/2016 20:00	2016-05-31	20:00:00	26.598	2016	5	22
5/31/2016 21:00	2016-05-31	21:00:00	26.622	2016	5	22
5/31/2016 22:00	2016-05-31	22:00:00	26.671	2016	5	22
5/31/2016 23:00	2016-05-31	23:00:00	26.573	2016	5	22
2016-01-06	2016-06-01	00:00:00	26.72	2016	6	22
2016-01-06 01:00:00	2016-06-01	01:00:00	26.769	2016	6	22
2016-01-06 02:00:00	2016-06-01	02:00:00	26.72	2016	6	22
2016-01-06 03:00:00	2016-06-01	03:00:00	26.671	2016	6	22
2016-01-06 04:00:00	2016-06-01	04:00:00	26.475	2016	6	22
2016-01-06 05:00:00	2016-06-01	05:00:00	26.5	2016	6	22
2016-01-06 06:00:00	2016-06-01	06:00:00	26.549	2016	6	22
2016-01-06 07:00:00	2016-06-01	07:00:00	26.573	2016	6	22
2016-01-06 08:00:00	2016-06-01	08:00:00	26.598	2016	6	22
2016-01-06 09:00:00	2016-06-01	09:00:00	26.622	2016	6	22
2016-01-06 10:00:00	2016-06-01	10:00:00	26.695	2016	6	22
2016-01-06 11:00:00	2016-06-01	11:00:00	26.965	2016	6	22
2016-01-06 12:00:00	2016-06-01	12:00:00	27.161	2016	6	22
2016-01-06 13:00:00	2016-06-01	13:00:00	27.456	2016	6	22
2016-01-06 14:00:00	2016-06-01	14:00:00	27.505	2016	6	22
2016-01-06 15:00:00	2016-06-01	15:00:00	27.456	2016	6	22
2016-01-06 16:00:00	2016-06-01	16:00:00	27.358	2016	6	22
2016-01-06 17:00:00	2016-06-01	17:00:00	27.136	2016	6	22
2016-01-06 18:00:00	2016-06-01	18:00:00	27.186	2016	6	22
2016-01-06 19:00:00	2016-06-01	19:00:00	27.087	2016	6	22
2016-01-06 20:00:00	2016-06-01	20:00:00	27.038	2016	6	22
2016-01-06 21:00:00	2016-06-01	21:00:00	27.038	2016	6	22
2016-01-06 22:00:00	2016-06-01	22:00:00	27.038	2016	6	22
2016-01-06 23:00:00	2016-06-01	23:00:00	26.867	2016	6	22
2016-02-06	2016-06-02	00:00:00	26.842	2016	6	22
2016-02-06 01:00:00	2016-06-02	01:00:00	26.818	2016	6	22
2016-02-06 02:00:00	2016-06-02	02:00:00	26.867	2016	6	22
2016-02-06 03:00:00	2016-06-02	03:00:00	26.867	2016	6	22
2016-02-06 04:00:00	2016-06-02	04:00:00	26.842	2016	6	22
2016-02-06 05:00:00	2016-06-02	05:00:00	26.769	2016	6	22
2016-02-06 06:00:00	2016-06-02	06:00:00	26.744	2016	6	22
2016-02-06 07:00:00	2016-06-02	07:00:00	26.744	2016	6	22
2016-02-06 08:00:00	2016-06-02	08:00:00	26.744	2016	6	22
2016-02-06 09:00:00	2016-06-02	09:00:00	26.72	2016	6	22
2016-02-06 10:00:00	2016-06-02	10:00:00	26.793	2016	6	22
2016-02-06 11:00:00	2016-06-02	11:00:00	26.989	2016	6	22
2016-02-06 12:00:00	2016-06-02	12:00:00	27.063	2016	6	22
2016-02-06 13:00:00	2016-06-02	13:00:00	27.161	2016	6	22
2016-02-06 14:00:00	2016-06-02	14:00:00	27.014	2016	6	22
2016-02-06 15:00:00	2016-06-02	15:00:00	26.916	2016	6	22
2016-02-06 16:00:00	2016-06-02	16:00:00	26.793	2016	6	22
2016-02-06 17:00:00	2016-06-02	17:00:00	26.72	2016	6	22
2016-02-06 18:00:00	2016-06-02	18:00:00	26.72	2016	6	22
2016-02-06 19:00:00	2016-06-02	19:00:00	26.695	2016	6	22
2016-02-06 20:00:00	2016-06-02	20:00:00	26.646	2016	6	22
2016-02-06 21:00:00	2016-06-02	21:00:00	26.622	2016	6	22
2016-02-06 22:00:00	2016-06-02	22:00:00	26.622	2016	6	22
2016-02-06 23:00:00	2016-06-02	23:00:00	26.524	2016	6	22
2016-03-06	2016-06-03	00:00:00	26.402	2016	6	22
2016-03-06 01:00:00	2016-06-03	01:00:00	26.5	2016	6	22
2016-03-06 02:00:00	2016-06-03	02:00:00	26.402	2016	6	22
2016-03-06 03:00:00	2016-06-03	03:00:00	26.353	2016	6	22
2016-03-06 04:00:00	2016-06-03	04:00:00	26.329	2016	6	22
2016-03-06 05:00:00	2016-06-03	05:00:00	26.329	2016	6	22
2016-03-06 06:00:00	2016-06-03	06:00:00	26.256	2016	6	22
2016-03-06 07:00:00	2016-06-03	07:00:00	26.256	2016	6	22
2016-03-06 08:00:00	2016-06-03	08:00:00	26.28	2016	6	22
2016-03-06 09:00:00	2016-06-03	09:00:00	26.256	2016	6	22
2016-03-06 10:00:00	2016-06-03	10:00:00	26.304	2016	6	22
2016-03-06 11:00:00	2016-06-03	11:00:00	26.256	2016	6	22
2016-03-06 12:00:00	2016-06-03	12:00:00	26.304	2016	6	22
2016-03-06 13:00:00	2016-06-03	13:00:00	26.378	2016	6	22
2016-03-06 14:00:00	2016-06-03	14:00:00	26.304	2016	6	22
2016-03-06 15:00:00	2016-06-03	15:00:00	26.304	2016	6	22
2016-03-06 16:00:00	2016-06-03	16:00:00	26.329	2016	6	22
2016-03-06 17:00:00	2016-06-03	17:00:00	26.329	2016	6	22
2016-03-06 18:00:00	2016-06-03	18:00:00	26.353	2016	6	22
2016-03-06 19:00:00	2016-06-03	19:00:00	26.207	2016	6	22
2016-03-06 20:00:00	2016-06-03	20:00:00	26.182	2016	6	22
2016-03-06 21:00:00	2016-06-03	21:00:00	26.134	2016	6	22
2016-03-06 22:00:00	2016-06-03	22:00:00	26.061	2016	6	22
2016-03-06 23:00:00	2016-06-03	23:00:00	25.987	2016	6	22
2016-04-06	2016-06-04	00:00:00	25.914	2016	6	22
2016-04-06 01:00:00	2016-06-04	01:00:00	25.914	2016	6	22
2016-04-06 02:00:00	2016-06-04	02:00:00	25.939	2016	6	22
2016-04-06 03:00:00	2016-06-04	03:00:00	25.963	2016	6	22
2016-04-06 04:00:00	2016-06-04	04:00:00	25.987	2016	6	22
2016-04-06 05:00:00	2016-06-04	05:00:00	26.012	2016	6	22
2016-04-06 06:00:00	2016-06-04	06:00:00	26.036	2016	6	22
2016-04-06 07:00:00	2016-06-04	07:00:00	26.109	2016	6	22
2016-04-06 08:00:00	2016-06-04	08:00:00	26.158	2016	6	22
2016-04-06 09:00:00	2016-06-04	09:00:00	26.378	2016	6	22
2016-04-06 10:00:00	2016-06-04	10:00:00	26.695	2016	6	22
2016-04-06 11:00:00	2016-06-04	11:00:00	27.407	2016	6	22
2016-04-06 12:00:00	2016-06-04	12:00:00	28.245	2016	6	22
2016-04-06 13:00:00	2016-06-04	13:00:00	29.04	2016	6	22
2016-04-06 14:00:00	2016-06-04	14:00:00	28.965	2016	6	22
2016-04-06 15:00:00	2016-06-04	15:00:00	27.53	2016	6	22
2016-04-06 16:00:00	2016-06-04	16:00:00	27.259	2016	6	22
2016-04-06 17:00:00	2016-06-04	17:00:00	27.087	2016	6	22
2016-04-06 18:00:00	2016-06-04	18:00:00	26.94	2016	6	22
2016-04-06 19:00:00	2016-06-04	19:00:00	26.989	2016	6	22
2016-04-06 20:00:00	2016-06-04	20:00:00	26.573	2016	6	22
2016-04-06 21:00:00	2016-06-04	21:00:00	26.182	2016	6	22
2016-04-06 22:00:00	2016-06-04	22:00:00	26.182	2016	6	22
2016-04-06 23:00:00	2016-06-04	23:00:00	26.231	2016	6	22
2016-05-06	2016-06-05	00:00:00	26.28	2016	6	23
2016-05-06 01:00:00	2016-06-05	01:00:00	26.182	2016	6	23
2016-05-06 02:00:00	2016-06-05	02:00:00	26.036	2016	6	23
2016-05-06 03:00:00	2016-06-05	03:00:00	26.036	2016	6	23
2016-05-06 04:00:00	2016-06-05	04:00:00	25.914	2016	6	23
2016-05-06 05:00:00	2016-06-05	05:00:00	25.963	2016	6	23
2016-05-06 06:00:00	2016-06-05	06:00:00	25.866	2016	6	23
2016-05-06 07:00:00	2016-06-05	07:00:00	25.939	2016	6	23
2016-05-06 08:00:00	2016-06-05	08:00:00	25.817	2016	6	23
2016-05-06 09:00:00	2016-06-05	09:00:00	25.574	2016	6	23
2016-05-06 10:00:00	2016-06-05	10:00:00	25.72	2016	6	23
2016-05-06 11:00:00	2016-06-05	11:00:00	26.378	2016	6	23
2016-05-06 12:00:00	2016-06-05	12:00:00	26.94	2016	6	23
2016-05-06 13:00:00	2016-06-05	13:00:00	27.554	2016	6	23
2016-05-06 14:00:00	2016-06-05	14:00:00	27.235	2016	6	23
2016-05-06 15:00:00	2016-06-05	15:00:00	27.186	2016	6	23
2016-05-06 16:00:00	2016-06-05	16:00:00	26.158	2016	6	23
2016-05-06 17:00:00	2016-06-05	17:00:00	26.158	2016	6	23
2016-05-06 18:00:00	2016-06-05	18:00:00	26.256	2016	6	23
2016-05-06 19:00:00	2016-06-05	19:00:00	26.231	2016	6	23
2016-05-06 20:00:00	2016-06-05	20:00:00	25.768	2016	6	23
2016-05-06 21:00:00	2016-06-05	21:00:00	25.671	2016	6	23
2016-05-06 22:00:00	2016-06-05	22:00:00	25.623	2016	6	23
2016-05-06 23:00:00	2016-06-05	23:00:00	25.623	2016	6	23
2016-06-06	2016-06-06	00:00:00	25.623	2016	6	23
2016-06-06 01:00:00	2016-06-06	01:00:00	25.623	2016	6	23
2016-06-06 02:00:00	2016-06-06	02:00:00	25.671	2016	6	23
2016-06-06 03:00:00	2016-06-06	03:00:00	25.55	2016	6	23
2016-06-06 04:00:00	2016-06-06	04:00:00	25.501	2016	6	23
2016-06-06 05:00:00	2016-06-06	05:00:00	25.501	2016	6	23
2016-06-06 06:00:00	2016-06-06	06:00:00	25.477	2016	6	23
2016-06-06 07:00:00	2016-06-06	07:00:00	25.525	2016	6	23
2016-06-06 08:00:00	2016-06-06	08:00:00	25.647	2016	6	23
2016-06-06 09:00:00	2016-06-06	09:00:00	25.695	2016	6	23
2016-06-06 10:00:00	2016-06-06	10:00:00	25.89	2016	6	23
2016-06-06 11:00:00	2016-06-06	11:00:00	26.256	2016	6	23
2016-06-06 12:00:00	2016-06-06	12:00:00	26.329	2016	6	23
2016-06-06 13:00:00	2016-06-06	13:00:00	27.112	2016	6	23
2016-06-06 14:00:00	2016-06-06	14:00:00	27.382	2016	6	23
2016-06-06 15:00:00	2016-06-06	15:00:00	26.842	2016	6	23
2016-06-06 16:00:00	2016-06-06	16:00:00	26.353	2016	6	23
2016-06-06 17:00:00	2016-06-06	17:00:00	26.158	2016	6	23
2016-06-06 18:00:00	2016-06-06	18:00:00	26.158	2016	6	23
2016-06-06 19:00:00	2016-06-06	19:00:00	25.963	2016	6	23
2016-06-06 20:00:00	2016-06-06	20:00:00	26.036	2016	6	23
2016-06-06 21:00:00	2016-06-06	21:00:00	26.085	2016	6	23
2016-06-06 22:00:00	2016-06-06	22:00:00	25.963	2016	6	23
2016-06-06 23:00:00	2016-06-06	23:00:00	25.817	2016	6	23
2016-07-06	2016-06-07	00:00:00	25.793	2016	6	23
2016-07-06 01:00:00	2016-06-07	01:00:00	25.793	2016	6	23
2016-07-06 02:00:00	2016-06-07	02:00:00	25.695	2016	6	23
2016-07-06 03:00:00	2016-06-07	03:00:00	25.647	2016	6	23
2016-07-06 04:00:00	2016-06-07	04:00:00	25.695	2016	6	23
2016-07-06 05:00:00	2016-06-07	05:00:00	25.623	2016	6	23
2016-07-06 06:00:00	2016-06-07	06:00:00	25.695	2016	6	23
2016-07-06 07:00:00	2016-06-07	07:00:00	25.768	2016	6	23
2016-07-06 08:00:00	2016-06-07	08:00:00	25.914	2016	6	23
2016-07-06 09:00:00	2016-06-07	09:00:00	25.963	2016	6	23
2016-07-06 10:00:00	2016-06-07	10:00:00	26.158	2016	6	23
2016-07-06 11:00:00	2016-06-07	11:00:00	26.182	2016	6	23
2016-07-06 12:00:00	2016-06-07	12:00:00	26.426	2016	6	23
2016-07-06 13:00:00	2016-06-07	13:00:00	26.818	2016	6	23
2016-07-06 14:00:00	2016-06-07	14:00:00	27.751	2016	6	23
2016-07-06 15:00:00	2016-06-07	15:00:00	28.32	2016	6	23
2016-07-06 16:00:00	2016-06-07	16:00:00	28.518	2016	6	23
2016-07-06 17:00:00	2016-06-07	17:00:00	27.431	2016	6	23
2016-07-06 18:00:00	2016-06-07	18:00:00	26.549	2016	6	23
2016-07-06 19:00:00	2016-06-07	19:00:00	26.256	2016	6	23
2016-07-06 20:00:00	2016-06-07	20:00:00	26.134	2016	6	23
2016-07-06 21:00:00	2016-06-07	21:00:00	26.182	2016	6	23
2016-07-06 22:00:00	2016-06-07	22:00:00	26.036	2016	6	23
2016-07-06 23:00:00	2016-06-07	23:00:00	25.841	2016	6	23
2016-08-06	2016-06-08	00:00:00	25.914	2016	6	23
2016-08-06 01:00:00	2016-06-08	01:00:00	25.89	2016	6	23
2016-08-06 02:00:00	2016-06-08	02:00:00	25.793	2016	6	23
2016-08-06 03:00:00	2016-06-08	03:00:00	25.89	2016	6	23
2016-08-06 04:00:00	2016-06-08	04:00:00	25.866	2016	6	23
2016-08-06 05:00:00	2016-06-08	05:00:00	25.89	2016	6	23
2016-08-06 06:00:00	2016-06-08	06:00:00	25.963	2016	6	23
2016-08-06 07:00:00	2016-06-08	07:00:00	26.012	2016	6	23
2016-08-06 08:00:00	2016-06-08	08:00:00	26.109	2016	6	23
2016-08-06 09:00:00	2016-06-08	09:00:00	26.061	2016	6	23
2016-08-06 10:00:00	2016-06-08	10:00:00	26.28	2016	6	23
2016-08-06 11:00:00	2016-06-08	11:00:00	26.329	2016	6	23
2016-08-06 12:00:00	2016-06-08	12:00:00	26.549	2016	6	23
2016-08-06 13:00:00	2016-06-08	13:00:00	26.867	2016	6	23
2016-08-06 14:00:00	2016-06-08	14:00:00	27.579	2016	6	23
2016-08-06 15:00:00	2016-06-08	15:00:00	28.097	2016	6	23
2016-08-06 16:00:00	2016-06-08	16:00:00	28.147	2016	6	23
2016-08-06 17:00:00	2016-06-08	17:00:00	27.875	2016	6	23
2016-08-06 18:00:00	2016-06-08	18:00:00	26.891	2016	6	23
2016-08-06 19:00:00	2016-06-08	19:00:00	26.549	2016	6	23
2016-08-06 20:00:00	2016-06-08	20:00:00	26.451	2016	6	23
2016-08-06 21:00:00	2016-06-08	21:00:00	26.451	2016	6	23
2016-08-06 22:00:00	2016-06-08	22:00:00	26.158	2016	6	23
2016-08-06 23:00:00	2016-06-08	23:00:00	25.89	2016	6	23
2016-09-06	2016-06-09	00:00:00	25.768	2016	6	23
2016-09-06 01:00:00	2016-06-09	01:00:00	25.841	2016	6	23
2016-09-06 02:00:00	2016-06-09	02:00:00	25.939	2016	6	23
2016-09-06 03:00:00	2016-06-09	03:00:00	25.963	2016	6	23
2016-09-06 04:00:00	2016-06-09	04:00:00	25.939	2016	6	23
2016-09-06 05:00:00	2016-06-09	05:00:00	25.89	2016	6	23
2016-09-06 06:00:00	2016-06-09	06:00:00	25.866	2016	6	23
2016-09-06 07:00:00	2016-06-09	07:00:00	26.061	2016	6	23
2016-09-06 08:00:00	2016-06-09	08:00:00	26.182	2016	6	23
2016-09-06 09:00:00	2016-06-09	09:00:00	26.28	2016	6	23
2016-09-06 10:00:00	2016-06-09	10:00:00	26.451	2016	6	23
2016-09-06 11:00:00	2016-06-09	11:00:00	26.329	2016	6	23
2016-09-06 12:00:00	2016-06-09	12:00:00	26.622	2016	6	23
2016-09-06 13:00:00	2016-06-09	13:00:00	26.744	2016	6	23
2016-09-06 14:00:00	2016-06-09	14:00:00	26.94	2016	6	23
2016-09-06 15:00:00	2016-06-09	15:00:00	27.554	2016	6	23
2016-09-06 16:00:00	2016-06-09	16:00:00	27.727	2016	6	23
2016-09-06 17:00:00	2016-06-09	17:00:00	27.751	2016	6	23
2016-09-06 18:00:00	2016-06-09	18:00:00	27.087	2016	6	23
2016-09-06 19:00:00	2016-06-09	19:00:00	26.72	2016	6	23
2016-09-06 20:00:00	2016-06-09	20:00:00	26.475	2016	6	23
2016-09-06 21:00:00	2016-06-09	21:00:00	26.353	2016	6	23
2016-09-06 22:00:00	2016-06-09	22:00:00	26.329	2016	6	23
2016-09-06 23:00:00	2016-06-09	23:00:00	26.231	2016	6	23
2016-10-06	2016-06-10	00:00:00	26.134	2016	6	23
2016-10-06 01:00:00	2016-06-10	01:00:00	26.134	2016	6	23
2016-10-06 02:00:00	2016-06-10	02:00:00	26.158	2016	6	23
2016-10-06 03:00:00	2016-06-10	03:00:00	26.182	2016	6	23
2016-10-06 04:00:00	2016-06-10	04:00:00	26.158	2016	6	23
2016-10-06 05:00:00	2016-06-10	05:00:00	26.109	2016	6	23
2016-10-06 06:00:00	2016-06-10	06:00:00	26.109	2016	6	23
2016-10-06 07:00:00	2016-06-10	07:00:00	26.134	2016	6	23
2016-10-06 08:00:00	2016-06-10	08:00:00	26.207	2016	6	23
2016-10-06 09:00:00	2016-06-10	09:00:00	26.304	2016	6	23
2016-10-06 10:00:00	2016-06-10	10:00:00	26.426	2016	6	23
2016-10-06 11:00:00	2016-06-10	11:00:00	26.426	2016	6	23
2016-10-06 12:00:00	2016-06-10	12:00:00	26.426	2016	6	23
2016-10-06 13:00:00	2016-06-10	13:00:00	26.622	2016	6	23
2016-10-06 14:00:00	2016-06-10	14:00:00	26.231	2016	6	23
2016-10-06 15:00:00	2016-06-10	15:00:00	26.304	2016	6	23
2016-10-06 16:00:00	2016-06-10	16:00:00	26.378	2016	6	23
2016-10-06 17:00:00	2016-06-10	17:00:00	26.622	2016	6	23
2016-10-06 18:00:00	2016-06-10	18:00:00	26.671	2016	6	23
2016-10-06 19:00:00	2016-06-10	19:00:00	26.549	2016	6	23
2016-10-06 20:00:00	2016-06-10	20:00:00	26.426	2016	6	23
2016-10-06 21:00:00	2016-06-10	21:00:00	26.5	2016	6	23
2016-10-06 22:00:00	2016-06-10	22:00:00	26.426	2016	6	23
2016-10-06 23:00:00	2016-06-10	23:00:00	26.378	2016	6	23
2016-11-06	2016-06-11	00:00:00	26.329	2016	6	23
2016-11-06 01:00:00	2016-06-11	01:00:00	26.329	2016	6	23
2016-11-06 02:00:00	2016-06-11	02:00:00	26.304	2016	6	23
2016-11-06 03:00:00	2016-06-11	03:00:00	26.304	2016	6	23
2016-11-06 04:00:00	2016-06-11	04:00:00	26.304	2016	6	23
2016-11-06 05:00:00	2016-06-11	05:00:00	26.28	2016	6	23
2016-11-06 06:00:00	2016-06-11	06:00:00	26.256	2016	6	23
2016-11-06 07:00:00	2016-06-11	07:00:00	26.304	2016	6	23
2016-11-06 08:00:00	2016-06-11	08:00:00	26.353	2016	6	23
2016-11-06 09:00:00	2016-06-11	09:00:00	26.426	2016	6	23
2016-11-06 10:00:00	2016-06-11	10:00:00	26.549	2016	6	23
2016-11-06 11:00:00	2016-06-11	11:00:00	26.671	2016	6	23
2016-11-06 12:00:00	2016-06-11	12:00:00	26.622	2016	6	23
2016-11-06 13:00:00	2016-06-11	13:00:00	26.622	2016	6	23
2016-11-06 14:00:00	2016-06-11	14:00:00	26.549	2016	6	23
2016-11-06 15:00:00	2016-06-11	15:00:00	26.622	2016	6	23
2016-11-06 16:00:00	2016-06-11	16:00:00	26.524	2016	6	23
2016-11-06 17:00:00	2016-06-11	17:00:00	26.744	2016	6	23
2016-11-06 18:00:00	2016-06-11	18:00:00	26.695	2016	6	23
2016-11-06 19:00:00	2016-06-11	19:00:00	26.646	2016	6	23
2016-11-06 20:00:00	2016-06-11	20:00:00	26.573	2016	6	23
2016-11-06 21:00:00	2016-06-11	21:00:00	26.549	2016	6	23
2016-11-06 22:00:00	2016-06-11	22:00:00	26.475	2016	6	23
2016-11-06 23:00:00	2016-06-11	23:00:00	26.378	2016	6	23
2016-12-06	2016-06-12	00:00:00	26.304	2016	6	24
2016-12-06 01:00:00	2016-06-12	01:00:00	26.28	2016	6	24
2016-12-06 02:00:00	2016-06-12	02:00:00	26.256	2016	6	24
2016-12-06 03:00:00	2016-06-12	03:00:00	26.207	2016	6	24
2016-12-06 04:00:00	2016-06-12	04:00:00	26.182	2016	6	24
2016-12-06 05:00:00	2016-06-12	05:00:00	26.182	2016	6	24
2016-12-06 06:00:00	2016-06-12	06:00:00	26.158	2016	6	24
2016-12-06 07:00:00	2016-06-12	07:00:00	26.134	2016	6	24
2016-12-06 08:00:00	2016-06-12	08:00:00	26.134	2016	6	24
2016-12-06 09:00:00	2016-06-12	09:00:00	26.207	2016	6	24
2016-12-06 10:00:00	2016-06-12	10:00:00	26.378	2016	6	24
2016-12-06 11:00:00	2016-06-12	11:00:00	26.451	2016	6	24
2016-12-06 12:00:00	2016-06-12	12:00:00	26.598	2016	6	24
2016-12-06 13:00:00	2016-06-12	13:00:00	26.524	2016	6	24
2016-12-06 14:00:00	2016-06-12	14:00:00	26.378	2016	6	24
2016-12-06 15:00:00	2016-06-12	15:00:00	26.329	2016	6	24
2016-12-06 16:00:00	2016-06-12	16:00:00	26.329	2016	6	24
2016-12-06 17:00:00	2016-06-12	17:00:00	25.987	2016	6	24
2016-12-06 18:00:00	2016-06-12	18:00:00	26.061	2016	6	24
2016-12-06 19:00:00	2016-06-12	19:00:00	26.109	2016	6	24
2016-12-06 20:00:00	2016-06-12	20:00:00	26.134	2016	6	24
2016-12-06 21:00:00	2016-06-12	21:00:00	26.085	2016	6	24
2016-12-06 22:00:00	2016-06-12	22:00:00	26.085	2016	6	24
2016-12-06 23:00:00	2016-06-12	23:00:00	26.085	2016	6	24
6/13/2016 0:00	2016-06-13	00:00:00	26.085	2016	6	24
6/13/2016 1:00	2016-06-13	01:00:00	26.109	2016	6	24
6/13/2016 2:00	2016-06-13	02:00:00	26.134	2016	6	24
6/13/2016 3:00	2016-06-13	03:00:00	26.109	2016	6	24
6/13/2016 4:00	2016-06-13	04:00:00	26.134	2016	6	24
6/13/2016 5:00	2016-06-13	05:00:00	26.085	2016	6	24
6/13/2016 6:00	2016-06-13	06:00:00	26.085	2016	6	24
6/13/2016 7:00	2016-06-13	07:00:00	26.109	2016	6	24
6/13/2016 8:00	2016-06-13	08:00:00	26.085	2016	6	24
6/13/2016 9:00	2016-06-13	09:00:00	26.158	2016	6	24
6/13/2016 10:00	2016-06-13	10:00:00	26.182	2016	6	24
6/13/2016 11:00	2016-06-13	11:00:00	26.207	2016	6	24
6/13/2016 12:00	2016-06-13	12:00:00	26.256	2016	6	24
6/13/2016 13:00	2016-06-13	13:00:00	26.353	2016	6	24
6/13/2016 14:00	2016-06-13	14:00:00	26.329	2016	6	24
6/13/2016 15:00	2016-06-13	15:00:00	26.304	2016	6	24
6/13/2016 16:00	2016-06-13	16:00:00	26.304	2016	6	24
6/13/2016 17:00	2016-06-13	17:00:00	26.5	2016	6	24
6/13/2016 18:00	2016-06-13	18:00:00	26.524	2016	6	24
6/13/2016 19:00	2016-06-13	19:00:00	26.5	2016	6	24
6/13/2016 20:00	2016-06-13	20:00:00	26.353	2016	6	24
6/13/2016 21:00	2016-06-13	21:00:00	26.28	2016	6	24
6/13/2016 22:00	2016-06-13	22:00:00	26.231	2016	6	24
6/13/2016 23:00	2016-06-13	23:00:00	26.207	2016	6	24
6/14/2016 0:00	2016-06-14	00:00:00	26.207	2016	6	24
6/14/2016 1:00	2016-06-14	01:00:00	26.158	2016	6	24
6/14/2016 2:00	2016-06-14	02:00:00	26.182	2016	6	24
6/14/2016 3:00	2016-06-14	03:00:00	26.182	2016	6	24
6/14/2016 4:00	2016-06-14	04:00:00	26.182	2016	6	24
6/14/2016 5:00	2016-06-14	05:00:00	26.158	2016	6	24
6/14/2016 6:00	2016-06-14	06:00:00	26.158	2016	6	24
6/14/2016 7:00	2016-06-14	07:00:00	26.207	2016	6	24
6/14/2016 8:00	2016-06-14	08:00:00	26.256	2016	6	24
6/14/2016 9:00	2016-06-14	09:00:00	26.329	2016	6	24
6/14/2016 10:00	2016-06-14	10:00:00	26.378	2016	6	24
6/14/2016 11:00	2016-06-14	11:00:00	26.353	2016	6	24
6/14/2016 12:00	2016-06-14	12:00:00	26.329	2016	6	24
6/14/2016 13:00	2016-06-14	13:00:00	26.329	2016	6	24
6/14/2016 14:00	2016-06-14	14:00:00	26.353	2016	6	24
6/14/2016 15:00	2016-06-14	15:00:00	26.378	2016	6	24
6/14/2016 16:00	2016-06-14	16:00:00	26.426	2016	6	24
6/14/2016 17:00	2016-06-14	17:00:00	26.426	2016	6	24
6/14/2016 18:00	2016-06-14	18:00:00	26.426	2016	6	24
6/14/2016 19:00	2016-06-14	19:00:00	26.426	2016	6	24
6/14/2016 20:00	2016-06-14	20:00:00	26.378	2016	6	24
6/14/2016 21:00	2016-06-14	21:00:00	26.402	2016	6	24
6/14/2016 22:00	2016-06-14	22:00:00	26.426	2016	6	24
6/14/2016 23:00	2016-06-14	23:00:00	26.353	2016	6	24
6/15/2016 0:00	2016-06-15	00:00:00	26.304	2016	6	24
6/15/2016 1:00	2016-06-15	01:00:00	26.304	2016	6	24
6/15/2016 2:00	2016-06-15	02:00:00	26.28	2016	6	24
6/15/2016 3:00	2016-06-15	03:00:00	26.256	2016	6	24
6/15/2016 4:00	2016-06-15	04:00:00	26.28	2016	6	24
6/15/2016 5:00	2016-06-15	05:00:00	26.256	2016	6	24
6/15/2016 6:00	2016-06-15	06:00:00	26.231	2016	6	24
6/15/2016 7:00	2016-06-15	07:00:00	26.231	2016	6	24
6/15/2016 8:00	2016-06-15	08:00:00	26.28	2016	6	24
6/15/2016 9:00	2016-06-15	09:00:00	26.426	2016	6	24
6/15/2016 10:00	2016-06-15	10:00:00	26.622	2016	6	24
6/15/2016 11:00	2016-06-15	11:00:00	26.94	2016	6	24
6/15/2016 12:00	2016-06-15	12:00:00	27.038	2016	6	24
6/15/2016 13:00	2016-06-15	13:00:00	26.916	2016	6	24
6/15/2016 14:00	2016-06-15	14:00:00	26.94	2016	6	24
6/15/2016 15:00	2016-06-15	15:00:00	26.818	2016	6	24
6/15/2016 16:00	2016-06-15	16:00:00	26.769	2016	6	24
6/15/2016 17:00	2016-06-15	17:00:00	26.867	2016	6	24
6/15/2016 18:00	2016-06-15	18:00:00	26.769	2016	6	24
6/15/2016 19:00	2016-06-15	19:00:00	26.867	2016	6	24
6/15/2016 20:00	2016-06-15	20:00:00	26.744	2016	6	24
6/15/2016 21:00	2016-06-15	21:00:00	26.671	2016	6	24
6/15/2016 22:00	2016-06-15	22:00:00	26.695	2016	6	24
6/15/2016 23:00	2016-06-15	23:00:00	26.671	2016	6	24
6/16/2016 0:00	2016-06-16	00:00:00	26.598	2016	6	24
6/16/2016 1:00	2016-06-16	01:00:00	26.549	2016	6	24
6/16/2016 2:00	2016-06-16	02:00:00	26.524	2016	6	24
6/16/2016 3:00	2016-06-16	03:00:00	26.5	2016	6	24
6/16/2016 4:00	2016-06-16	04:00:00	26.5	2016	6	24
6/16/2016 5:00	2016-06-16	05:00:00	26.5	2016	6	24
6/16/2016 6:00	2016-06-16	06:00:00	26.451	2016	6	24
6/16/2016 7:00	2016-06-16	07:00:00	26.451	2016	6	24
6/16/2016 8:00	2016-06-16	08:00:00	26.5	2016	6	24
6/16/2016 9:00	2016-06-16	09:00:00	26.695	2016	6	24
6/16/2016 10:00	2016-06-16	10:00:00	27.063	2016	6	24
6/16/2016 11:00	2016-06-16	11:00:00	27.481	2016	6	24
6/16/2016 12:00	2016-06-16	12:00:00	27.751	2016	6	24
6/16/2016 13:00	2016-06-16	13:00:00	27.801	2016	6	24
6/16/2016 14:00	2016-06-16	14:00:00	27.801	2016	6	24
6/16/2016 15:00	2016-06-16	15:00:00	27.604	2016	6	24
6/16/2016 16:00	2016-06-16	16:00:00	27.53	2016	6	24
6/16/2016 17:00	2016-06-16	17:00:00	27.53	2016	6	24
6/16/2016 18:00	2016-06-16	18:00:00	27.431	2016	6	24
6/16/2016 19:00	2016-06-16	19:00:00	27.235	2016	6	24
6/16/2016 20:00	2016-06-16	20:00:00	27.161	2016	6	24
6/16/2016 21:00	2016-06-16	21:00:00	27.161	2016	6	24
6/16/2016 22:00	2016-06-16	22:00:00	27.161	2016	6	24
6/16/2016 23:00	2016-06-16	23:00:00	27.063	2016	6	24
6/17/2016 0:00	2016-06-17	00:00:00	26.965	2016	6	24
6/17/2016 1:00	2016-06-17	01:00:00	26.867	2016	6	24
6/17/2016 2:00	2016-06-17	02:00:00	26.842	2016	6	24
6/17/2016 3:00	2016-06-17	03:00:00	26.842	2016	6	24
6/17/2016 4:00	2016-06-17	04:00:00	26.818	2016	6	24
6/17/2016 5:00	2016-06-17	05:00:00	26.769	2016	6	24
6/17/2016 6:00	2016-06-17	06:00:00	26.744	2016	6	24
6/17/2016 7:00	2016-06-17	07:00:00	26.671	2016	6	24
6/17/2016 8:00	2016-06-17	08:00:00	26.793	2016	6	24
6/17/2016 9:00	2016-06-17	09:00:00	27.063	2016	6	24
6/17/2016 10:00	2016-06-17	10:00:00	27.456	2016	6	24
6/17/2016 11:00	2016-06-17	11:00:00	27.875	2016	6	24
6/17/2016 12:00	2016-06-17	12:00:00	28.295	2016	6	24
6/17/2016 13:00	2016-06-17	13:00:00	28.493	2016	6	24
6/17/2016 14:00	2016-06-17	14:00:00	28.468	2016	6	24
6/17/2016 15:00	2016-06-17	15:00:00	28.27	2016	6	24
6/17/2016 16:00	2016-06-17	16:00:00	28.097	2016	6	24
6/17/2016 17:00	2016-06-17	17:00:00	27.924	2016	6	24
6/17/2016 18:00	2016-06-17	18:00:00	27.875	2016	6	24
6/17/2016 19:00	2016-06-17	19:00:00	27.014	2016	6	24
6/17/2016 20:00	2016-06-17	20:00:00	27.21	2016	6	24
6/17/2016 21:00	2016-06-17	21:00:00	27.407	2016	6	24
6/17/2016 22:00	2016-06-17	22:00:00	27.382	2016	6	24
6/17/2016 23:00	2016-06-17	23:00:00	27.407	2016	6	24
6/18/2016 0:00	2016-06-18	00:00:00	27.382	2016	6	24
6/18/2016 1:00	2016-06-18	01:00:00	27.284	2016	6	24
6/18/2016 2:00	2016-06-18	02:00:00	27.259	2016	6	24
6/18/2016 3:00	2016-06-18	03:00:00	27.235	2016	6	24
6/18/2016 4:00	2016-06-18	04:00:00	27.21	2016	6	24
6/18/2016 5:00	2016-06-18	05:00:00	27.21	2016	6	24
6/18/2016 6:00	2016-06-18	06:00:00	27.186	2016	6	24
6/18/2016 7:00	2016-06-18	07:00:00	27.21	2016	6	24
6/18/2016 8:00	2016-06-18	08:00:00	27.358	2016	6	24
6/18/2016 9:00	2016-06-18	09:00:00	27.554	2016	6	24
6/18/2016 10:00	2016-06-18	10:00:00	27.974	2016	6	24
6/18/2016 11:00	2016-06-18	11:00:00	28.369	2016	6	24
6/18/2016 12:00	2016-06-18	12:00:00	28.941	2016	6	24
6/18/2016 13:00	2016-06-18	13:00:00	29.19	2016	6	24
6/18/2016 14:00	2016-06-18	14:00:00	28.891	2016	6	24
6/18/2016 15:00	2016-06-18	15:00:00	28.518	2016	6	24
6/18/2016 16:00	2016-06-18	16:00:00	28.048	2016	6	24
6/18/2016 17:00	2016-06-18	17:00:00	27.801	2016	6	24
6/18/2016 18:00	2016-06-18	18:00:00	27.949	2016	6	24
6/18/2016 19:00	2016-06-18	19:00:00	27.751	2016	6	24
6/18/2016 20:00	2016-06-18	20:00:00	27.751	2016	6	24
6/18/2016 21:00	2016-06-18	21:00:00	27.776	2016	6	24
6/18/2016 22:00	2016-06-18	22:00:00	27.727	2016	6	24
6/18/2016 23:00	2016-06-18	23:00:00	27.702	2016	6	24
6/19/2016 0:00	2016-06-19	00:00:00	27.653	2016	6	25
6/19/2016 1:00	2016-06-19	01:00:00	27.604	2016	6	25
6/19/2016 2:00	2016-06-19	02:00:00	27.554	2016	6	25
6/19/2016 3:00	2016-06-19	03:00:00	27.505	2016	6	25
6/19/2016 4:00	2016-06-19	04:00:00	27.481	2016	6	25
6/19/2016 5:00	2016-06-19	05:00:00	27.481	2016	6	25
6/19/2016 6:00	2016-06-19	06:00:00	27.456	2016	6	25
6/19/2016 7:00	2016-06-19	07:00:00	27.481	2016	6	25
6/19/2016 8:00	2016-06-19	08:00:00	27.628	2016	6	25
6/19/2016 9:00	2016-06-19	09:00:00	27.801	2016	6	25
6/19/2016 10:00	2016-06-19	10:00:00	28.171	2016	6	25
6/19/2016 11:00	2016-06-19	11:00:00	28.742	2016	6	25
6/19/2016 12:00	2016-06-19	12:00:00	28.866	2016	6	25
6/19/2016 13:00	2016-06-19	13:00:00	29.165	2016	6	25
6/19/2016 14:00	2016-06-19	14:00:00	29.04	2016	6	25
6/19/2016 15:00	2016-06-19	15:00:00	28.642	2016	6	25
6/19/2016 16:00	2016-06-19	16:00:00	28.221	2016	6	25
6/19/2016 17:00	2016-06-19	17:00:00	28.27	2016	6	25
6/19/2016 18:00	2016-06-19	18:00:00	27.727	2016	6	25
6/19/2016 19:00	2016-06-19	19:00:00	27.727	2016	6	25
6/19/2016 20:00	2016-06-19	20:00:00	27.751	2016	6	25
6/19/2016 21:00	2016-06-19	21:00:00	27.579	2016	6	25
6/19/2016 22:00	2016-06-19	22:00:00	27.604	2016	6	25
6/19/2016 23:00	2016-06-19	23:00:00	27.628	2016	6	25
6/20/2016 0:00	2016-06-20	00:00:00	27.579	2016	6	25
6/20/2016 1:00	2016-06-20	01:00:00	27.53	2016	6	25
6/20/2016 2:00	2016-06-20	02:00:00	27.505	2016	6	25
6/20/2016 3:00	2016-06-20	03:00:00	27.554	2016	6	25
6/20/2016 4:00	2016-06-20	04:00:00	27.628	2016	6	25
6/20/2016 5:00	2016-06-20	05:00:00	27.628	2016	6	25
6/20/2016 6:00	2016-06-20	06:00:00	27.653	2016	6	25
6/20/2016 7:00	2016-06-20	07:00:00	27.677	2016	6	25
6/20/2016 8:00	2016-06-20	08:00:00	27.801	2016	6	25
6/20/2016 9:00	2016-06-20	09:00:00	27.825	2016	6	25
6/20/2016 10:00	2016-06-20	10:00:00	28.171	2016	6	25
6/20/2016 11:00	2016-06-20	11:00:00	28.468	2016	6	25
6/20/2016 12:00	2016-06-20	12:00:00	28.99	2016	6	25
6/20/2016 13:00	2016-06-20	13:00:00	29.59	2016	6	25
6/20/2016 14:00	2016-06-20	14:00:00	29.916	2016	6	25
6/20/2016 15:00	2016-06-20	15:00:00	29.515	2016	6	25
6/20/2016 16:00	2016-06-20	16:00:00	29.09	2016	6	25
6/20/2016 17:00	2016-06-20	17:00:00	28.791	2016	6	25
6/20/2016 18:00	2016-06-20	18:00:00	28.518	2016	6	25
6/20/2016 19:00	2016-06-20	19:00:00	28.369	2016	6	25
6/20/2016 20:00	2016-06-20	20:00:00	28.171	2016	6	25
6/20/2016 21:00	2016-06-20	21:00:00	28.097	2016	6	25
6/20/2016 22:00	2016-06-20	22:00:00	28.072	2016	6	25
6/20/2016 23:00	2016-06-20	23:00:00	27.998	2016	6	25
6/21/2016 0:00	2016-06-21	00:00:00	27.924	2016	6	25
6/21/2016 1:00	2016-06-21	01:00:00	27.85	2016	6	25
6/21/2016 2:00	2016-06-21	02:00:00	27.801	2016	6	25
6/21/2016 3:00	2016-06-21	03:00:00	27.85	2016	6	25
6/21/2016 4:00	2016-06-21	04:00:00	27.85	2016	6	25
6/21/2016 5:00	2016-06-21	05:00:00	27.85	2016	6	25
6/21/2016 6:00	2016-06-21	06:00:00	27.875	2016	6	25
6/21/2016 7:00	2016-06-21	07:00:00	27.899	2016	6	25
6/21/2016 8:00	2016-06-21	08:00:00	27.949	2016	6	25
6/21/2016 9:00	2016-06-21	09:00:00	28.048	2016	6	25
6/21/2016 10:00	2016-06-21	10:00:00	28.27	2016	6	25
6/21/2016 11:00	2016-06-21	11:00:00	28.419	2016	6	25
6/21/2016 12:00	2016-06-21	12:00:00	28.841	2016	6	25
6/21/2016 13:00	2016-06-21	13:00:00	29.815	2016	6	25
6/21/2016 14:00	2016-06-21	14:00:00	30.243	2016	6	25
6/21/2016 15:00	2016-06-21	15:00:00	29.941	2016	6	25
6/21/2016 16:00	2016-06-21	16:00:00	29.414	2016	6	25
6/21/2016 17:00	2016-06-21	17:00:00	28.642	2016	6	25
6/21/2016 18:00	2016-06-21	18:00:00	28.568	2016	6	25
6/21/2016 19:00	2016-06-21	19:00:00	28.518	2016	6	25
6/21/2016 20:00	2016-06-21	20:00:00	28.345	2016	6	25
6/21/2016 21:00	2016-06-21	21:00:00	28.394	2016	6	25
6/21/2016 22:00	2016-06-21	22:00:00	28.295	2016	6	25
6/21/2016 23:00	2016-06-21	23:00:00	28.295	2016	6	25
6/22/2016 0:00	2016-06-22	00:00:00	28.369	2016	6	25
6/22/2016 1:00	2016-06-22	01:00:00	28.345	2016	6	25
6/22/2016 2:00	2016-06-22	02:00:00	28.32	2016	6	25
6/22/2016 3:00	2016-06-22	03:00:00	28.27	2016	6	25
6/22/2016 4:00	2016-06-22	04:00:00	28.295	2016	6	25
6/22/2016 5:00	2016-06-22	05:00:00	28.295	2016	6	25
6/22/2016 6:00	2016-06-22	06:00:00	28.221	2016	6	25
6/22/2016 7:00	2016-06-22	07:00:00	28.245	2016	6	25
6/22/2016 8:00	2016-06-22	08:00:00	28.369	2016	6	25
6/22/2016 9:00	2016-06-22	09:00:00	28.444	2016	6	25
6/22/2016 10:00	2016-06-22	10:00:00	28.518	2016	6	25
6/22/2016 11:00	2016-06-22	11:00:00	28.692	2016	6	25
6/22/2016 12:00	2016-06-22	12:00:00	29.09	2016	6	25
6/22/2016 13:00	2016-06-22	13:00:00	29.64	2016	6	25
6/22/2016 14:00	2016-06-22	14:00:00	30.318	2016	6	25
6/22/2016 15:00	2016-06-22	15:00:00	30.369	2016	6	25
6/22/2016 16:00	2016-06-22	16:00:00	30.243	2016	6	25
6/22/2016 17:00	2016-06-22	17:00:00	29.515	2016	6	25
6/22/2016 18:00	2016-06-22	18:00:00	29.215	2016	6	25
6/22/2016 19:00	2016-06-22	19:00:00	29.065	2016	6	25
6/22/2016 20:00	2016-06-22	20:00:00	28.791	2016	6	25
6/22/2016 21:00	2016-06-22	21:00:00	28.692	2016	6	25
6/22/2016 22:00	2016-06-22	22:00:00	28.642	2016	6	25
6/22/2016 23:00	2016-06-22	23:00:00	28.617	2016	6	25
6/23/2016 0:00	2016-06-23	00:00:00	28.568	2016	6	25
6/23/2016 1:00	2016-06-23	01:00:00	28.543	2016	6	25
6/23/2016 2:00	2016-06-23	02:00:00	28.518	2016	6	25
6/23/2016 3:00	2016-06-23	03:00:00	28.444	2016	6	25
6/23/2016 4:00	2016-06-23	04:00:00	28.394	2016	6	25
6/23/2016 5:00	2016-06-23	05:00:00	28.394	2016	6	25
6/23/2016 6:00	2016-06-23	06:00:00	28.394	2016	6	25
6/23/2016 7:00	2016-06-23	07:00:00	28.394	2016	6	25
6/23/2016 8:00	2016-06-23	08:00:00	28.444	2016	6	25
6/23/2016 9:00	2016-06-23	09:00:00	28.617	2016	6	25
6/23/2016 10:00	2016-06-23	10:00:00	28.816	2016	6	25
6/23/2016 11:00	2016-06-23	11:00:00	28.891	2016	6	25
6/23/2016 12:00	2016-06-23	12:00:00	29.34	2016	6	25
6/23/2016 13:00	2016-06-23	13:00:00	30.041	2016	6	25
6/23/2016 14:00	2016-06-23	14:00:00	30.697	2016	6	25
6/23/2016 15:00	2016-06-23	15:00:00	30.976	2016	6	25
6/23/2016 16:00	2016-06-23	16:00:00	31.001	2016	6	25
6/23/2016 17:00	2016-06-23	17:00:00	30.016	2016	6	25
6/23/2016 18:00	2016-06-23	18:00:00	29.565	2016	6	25
6/23/2016 19:00	2016-06-23	19:00:00	29.265	2016	6	25
6/23/2016 20:00	2016-06-23	20:00:00	29.065	2016	6	25
6/23/2016 21:00	2016-06-23	21:00:00	28.891	2016	6	25
6/23/2016 22:00	2016-06-23	22:00:00	28.916	2016	6	25
6/23/2016 23:00	2016-06-23	23:00:00	28.841	2016	6	25
6/24/2016 0:00	2016-06-24	00:00:00	28.816	2016	6	25
6/24/2016 1:00	2016-06-24	01:00:00	28.816	2016	6	25
6/24/2016 2:00	2016-06-24	02:00:00	28.791	2016	6	25
6/24/2016 3:00	2016-06-24	03:00:00	28.717	2016	6	25
6/24/2016 4:00	2016-06-24	04:00:00	28.642	2016	6	25
6/24/2016 5:00	2016-06-24	05:00:00	28.617	2016	6	25
6/24/2016 6:00	2016-06-24	06:00:00	28.642	2016	6	25
6/24/2016 7:00	2016-06-24	07:00:00	28.717	2016	6	25
6/24/2016 8:00	2016-06-24	08:00:00	28.816	2016	6	25
6/24/2016 9:00	2016-06-24	09:00:00	28.941	2016	6	25
6/24/2016 10:00	2016-06-24	10:00:00	29.09	2016	6	25
6/24/2016 11:00	2016-06-24	11:00:00	29.24	2016	6	25
6/24/2016 12:00	2016-06-24	12:00:00	29.49	2016	6	25
6/24/2016 13:00	2016-06-24	13:00:00	29.89	2016	6	25
6/24/2016 14:00	2016-06-24	14:00:00	30.369	2016	6	25
6/24/2016 15:00	2016-06-24	15:00:00	30.469	2016	6	25
6/24/2016 16:00	2016-06-24	16:00:00	30.697	2016	6	25
6/24/2016 17:00	2016-06-24	17:00:00	30.192	2016	6	25
6/24/2016 18:00	2016-06-24	18:00:00	29.79	2016	6	25
6/24/2016 19:00	2016-06-24	19:00:00	29.615	2016	6	25
6/24/2016 20:00	2016-06-24	20:00:00	29.389	2016	6	25
6/24/2016 21:00	2016-06-24	21:00:00	29.115	2016	6	25
6/24/2016 22:00	2016-06-24	22:00:00	29.015	2016	6	25
6/24/2016 23:00	2016-06-24	23:00:00	28.941	2016	6	25
6/25/2016 0:00	2016-06-25	00:00:00	28.891	2016	6	25
6/25/2016 1:00	2016-06-25	01:00:00	28.891	2016	6	25
6/25/2016 2:00	2016-06-25	02:00:00	28.866	2016	6	25
6/25/2016 3:00	2016-06-25	03:00:00	28.791	2016	6	25
6/25/2016 4:00	2016-06-25	04:00:00	28.742	2016	6	25
6/25/2016 5:00	2016-06-25	05:00:00	28.667	2016	6	25
6/25/2016 6:00	2016-06-25	06:00:00	28.667	2016	6	25
6/25/2016 7:00	2016-06-25	07:00:00	28.717	2016	6	25
6/25/2016 8:00	2016-06-25	08:00:00	28.841	2016	6	25
6/25/2016 9:00	2016-06-25	09:00:00	29.015	2016	6	25
6/25/2016 10:00	2016-06-25	10:00:00	29.14	2016	6	25
6/25/2016 11:00	2016-06-25	11:00:00	29.115	2016	6	25
6/25/2016 12:00	2016-06-25	12:00:00	29.389	2016	6	25
6/25/2016 13:00	2016-06-25	13:00:00	29.59	2016	6	25
6/25/2016 14:00	2016-06-25	14:00:00	29.615	2016	6	25
6/25/2016 15:00	2016-06-25	15:00:00	30.621	2016	6	25
6/25/2016 16:00	2016-06-25	16:00:00	30.52	2016	6	25
6/25/2016 17:00	2016-06-25	17:00:00	30.142	2016	6	25
6/25/2016 18:00	2016-06-25	18:00:00	29.715	2016	6	25
6/25/2016 19:00	2016-06-25	19:00:00	29.515	2016	6	25
6/25/2016 20:00	2016-06-25	20:00:00	29.315	2016	6	25
6/25/2016 21:00	2016-06-25	21:00:00	29.215	2016	6	25
6/25/2016 22:00	2016-06-25	22:00:00	29.14	2016	6	25
6/25/2016 23:00	2016-06-25	23:00:00	29.09	2016	6	25
6/26/2016 0:00	2016-06-26	00:00:00	29.065	2016	6	26
6/26/2016 1:00	2016-06-26	01:00:00	28.99	2016	6	26
6/26/2016 2:00	2016-06-26	02:00:00	28.965	2016	6	26
6/26/2016 3:00	2016-06-26	03:00:00	28.916	2016	6	26
6/26/2016 4:00	2016-06-26	04:00:00	28.866	2016	6	26
6/26/2016 5:00	2016-06-26	05:00:00	28.791	2016	6	26
6/26/2016 6:00	2016-06-26	06:00:00	28.717	2016	6	26
6/26/2016 7:00	2016-06-26	07:00:00	28.766	2016	6	26
6/26/2016 8:00	2016-06-26	08:00:00	28.916	2016	6	26
6/26/2016 9:00	2016-06-26	09:00:00	28.99	2016	6	26
6/26/2016 10:00	2016-06-26	10:00:00	29.09	2016	6	26
6/26/2016 11:00	2016-06-26	11:00:00	29.14	2016	6	26
6/26/2016 12:00	2016-06-26	12:00:00	28.941	2016	6	26
6/26/2016 13:00	2016-06-26	13:00:00	29.015	2016	6	26
6/26/2016 14:00	2016-06-26	14:00:00	28.941	2016	6	26
6/26/2016 15:00	2016-06-26	15:00:00	28.965	2016	6	26
6/26/2016 16:00	2016-06-26	16:00:00	29.015	2016	6	26
6/26/2016 17:00	2016-06-26	17:00:00	28.916	2016	6	26
6/26/2016 18:00	2016-06-26	18:00:00	28.766	2016	6	26
6/26/2016 19:00	2016-06-26	19:00:00	28.791	2016	6	26
6/26/2016 20:00	2016-06-26	20:00:00	28.816	2016	6	26
6/26/2016 21:00	2016-06-26	21:00:00	28.816	2016	6	26
6/26/2016 22:00	2016-06-26	22:00:00	28.642	2016	6	26
6/26/2016 23:00	2016-06-26	23:00:00	28.642	2016	6	26
6/27/2016 0:00	2016-06-27	00:00:00	28.642	2016	6	26
6/27/2016 1:00	2016-06-27	01:00:00	28.667	2016	6	26
6/27/2016 2:00	2016-06-27	02:00:00	28.617	2016	6	26
6/27/2016 3:00	2016-06-27	03:00:00	28.518	2016	6	26
6/27/2016 4:00	2016-06-27	04:00:00	28.444	2016	6	26
6/27/2016 5:00	2016-06-27	05:00:00	28.394	2016	6	26
6/27/2016 6:00	2016-06-27	06:00:00	28.369	2016	6	26
6/27/2016 7:00	2016-06-27	07:00:00	28.345	2016	6	26
6/27/2016 8:00	2016-06-27	08:00:00	28.493	2016	6	26
6/27/2016 9:00	2016-06-27	09:00:00	28.692	2016	6	26
6/27/2016 10:00	2016-06-27	10:00:00	28.891	2016	6	26
6/27/2016 11:00	2016-06-27	11:00:00	28.965	2016	6	26
6/27/2016 12:00	2016-06-27	12:00:00	29.09	2016	6	26
6/27/2016 13:00	2016-06-27	13:00:00	29.065	2016	6	26
6/27/2016 14:00	2016-06-27	14:00:00	29.315	2016	6	26
6/27/2016 15:00	2016-06-27	15:00:00	29.389	2016	6	26
6/27/2016 16:00	2016-06-27	16:00:00	29.439	2016	6	26
6/27/2016 17:00	2016-06-27	17:00:00	29.515	2016	6	26
6/27/2016 18:00	2016-06-27	18:00:00	29.49	2016	6	26
6/27/2016 19:00	2016-06-27	19:00:00	29.29	2016	6	26
6/27/2016 20:00	2016-06-27	20:00:00	29.19	2016	6	26
6/27/2016 21:00	2016-06-27	21:00:00	29.065	2016	6	26
6/27/2016 22:00	2016-06-27	22:00:00	29.04	2016	6	26
6/27/2016 23:00	2016-06-27	23:00:00	28.99	2016	6	26
6/28/2016 0:00	2016-06-28	00:00:00	28.941	2016	6	26
6/28/2016 1:00	2016-06-28	01:00:00	28.916	2016	6	26
6/28/2016 2:00	2016-06-28	02:00:00	28.866	2016	6	26
6/28/2016 3:00	2016-06-28	03:00:00	28.841	2016	6	26
6/28/2016 4:00	2016-06-28	04:00:00	28.816	2016	6	26
6/28/2016 5:00	2016-06-28	05:00:00	28.742	2016	6	26
6/28/2016 6:00	2016-06-28	06:00:00	28.692	2016	6	26
6/28/2016 7:00	2016-06-28	07:00:00	28.742	2016	6	26
6/28/2016 8:00	2016-06-28	08:00:00	28.866	2016	6	26
6/28/2016 9:00	2016-06-28	09:00:00	29.065	2016	6	26
6/28/2016 10:00	2016-06-28	10:00:00	29.215	2016	6	26
6/28/2016 11:00	2016-06-28	11:00:00	29.389	2016	6	26
6/28/2016 12:00	2016-06-28	12:00:00	29.54	2016	6	26
6/28/2016 13:00	2016-06-28	13:00:00	29.64	2016	6	26
6/28/2016 14:00	2016-06-28	14:00:00	29.64	2016	6	26
6/28/2016 15:00	2016-06-28	15:00:00	29.84	2016	6	26
6/28/2016 16:00	2016-06-28	16:00:00	29.815	2016	6	26
6/28/2016 17:00	2016-06-28	17:00:00	29.916	2016	6	26
6/28/2016 18:00	2016-06-28	18:00:00	29.79	2016	6	26
6/28/2016 19:00	2016-06-28	19:00:00	29.665	2016	6	26
6/28/2016 20:00	2016-06-28	20:00:00	29.464	2016	6	26
6/28/2016 21:00	2016-06-28	21:00:00	29.34	2016	6	26
6/28/2016 22:00	2016-06-28	22:00:00	29.19	2016	6	26
6/28/2016 23:00	2016-06-28	23:00:00	29.115	2016	6	26
6/29/2016 0:00	2016-06-29	00:00:00	29.065	2016	6	26
6/29/2016 1:00	2016-06-29	01:00:00	29.015	2016	6	26
6/29/2016 2:00	2016-06-29	02:00:00	28.965	2016	6	26
6/29/2016 3:00	2016-06-29	03:00:00	28.941	2016	6	26
6/29/2016 4:00	2016-06-29	04:00:00	28.916	2016	6	26
6/29/2016 5:00	2016-06-29	05:00:00	28.891	2016	6	26
6/29/2016 6:00	2016-06-29	06:00:00	28.816	2016	6	26
6/29/2016 7:00	2016-06-29	07:00:00	28.791	2016	6	26
6/29/2016 8:00	2016-06-29	08:00:00	28.916	2016	6	26
6/29/2016 9:00	2016-06-29	09:00:00	29.365	2016	6	26
6/29/2016 10:00	2016-06-29	10:00:00	29.414	2016	6	26
6/29/2016 11:00	2016-06-29	11:00:00	29.49	2016	6	26
6/29/2016 12:00	2016-06-29	12:00:00	29.389	2016	6	26
6/29/2016 13:00	2016-06-29	13:00:00	29.64	2016	6	26
6/29/2016 14:00	2016-06-29	14:00:00	29.765	2016	6	26
6/29/2016 15:00	2016-06-29	15:00:00	29.69	2016	6	26
6/29/2016 16:00	2016-06-29	16:00:00	29.79	2016	6	26
6/29/2016 17:00	2016-06-29	17:00:00	29.565	2016	6	26
6/29/2016 18:00	2016-06-29	18:00:00	29.64	2016	6	26
6/29/2016 19:00	2016-06-29	19:00:00	29.49	2016	6	26
6/29/2016 20:00	2016-06-29	20:00:00	29.615	2016	6	26
6/29/2016 21:00	2016-06-29	21:00:00	29.464	2016	6	26
6/29/2016 22:00	2016-06-29	22:00:00	29.365	2016	6	26
6/29/2016 23:00	2016-06-29	23:00:00	29.29	2016	6	26
6/30/2016 0:00	2016-06-30	00:00:00	29.265	2016	6	26
6/30/2016 1:00	2016-06-30	01:00:00	29.24	2016	6	26
6/30/2016 2:00	2016-06-30	02:00:00	29.24	2016	6	26
6/30/2016 3:00	2016-06-30	03:00:00	29.215	2016	6	26
6/30/2016 4:00	2016-06-30	04:00:00	29.165	2016	6	26
6/30/2016 5:00	2016-06-30	05:00:00	29.09	2016	6	26
6/30/2016 6:00	2016-06-30	06:00:00	29.065	2016	6	26
6/30/2016 7:00	2016-06-30	07:00:00	29.015	2016	6	26
6/30/2016 8:00	2016-06-30	08:00:00	29.165	2016	6	26
6/30/2016 9:00	2016-06-30	09:00:00	29.414	2016	6	26
6/30/2016 10:00	2016-06-30	10:00:00	29.991	2016	6	26
6/30/2016 11:00	2016-06-30	11:00:00	30.192	2016	6	26
6/30/2016 12:00	2016-06-30	12:00:00	30.091	2016	6	26
6/30/2016 13:00	2016-06-30	13:00:00	29.991	2016	6	26
6/30/2016 14:00	2016-06-30	14:00:00	29.916	2016	6	26
6/30/2016 15:00	2016-06-30	15:00:00	29.765	2016	6	26
6/30/2016 16:00	2016-06-30	16:00:00	29.715	2016	6	26
6/30/2016 17:00	2016-06-30	17:00:00	29.49	2016	6	26
6/30/2016 18:00	2016-06-30	18:00:00	29.49	2016	6	26
6/30/2016 19:00	2016-06-30	19:00:00	29.615	2016	6	26
6/30/2016 20:00	2016-06-30	20:00:00	29.765	2016	6	26
6/30/2016 21:00	2016-06-30	21:00:00	29.69	2016	6	26
6/30/2016 22:00	2016-06-30	22:00:00	29.615	2016	6	26
6/30/2016 23:00	2016-06-30	23:00:00	29.565	2016	6	26
2016-01-07	2016-07-01	00:00:00	29.615	2016	7	26
2016-01-07 01:00:00	2016-07-01	01:00:00	29.59	2016	7	26
2016-01-07 02:00:00	2016-07-01	02:00:00	29.59	2016	7	26
2016-01-07 03:00:00	2016-07-01	03:00:00	29.615	2016	7	26
2016-01-07 04:00:00	2016-07-01	04:00:00	29.59	2016	7	26
2016-01-07 05:00:00	2016-07-01	05:00:00	29.515	2016	7	26
2016-01-07 06:00:00	2016-07-01	06:00:00	29.49	2016	7	26
2016-01-07 07:00:00	2016-07-01	07:00:00	29.49	2016	7	26
2016-01-07 08:00:00	2016-07-01	08:00:00	29.54	2016	7	26
2016-01-07 09:00:00	2016-07-01	09:00:00	29.665	2016	7	26
2016-01-07 10:00:00	2016-07-01	10:00:00	30.142	2016	7	26
2016-01-07 11:00:00	2016-07-01	11:00:00	30.621	2016	7	26
2016-01-07 12:00:00	2016-07-01	12:00:00	30.925	2016	7	26
2016-01-07 13:00:00	2016-07-01	13:00:00	30.95	2016	7	26
2016-01-07 14:00:00	2016-07-01	14:00:00	30.9	2016	7	26
2016-01-07 15:00:00	2016-07-01	15:00:00	30.722	2016	7	26
2016-01-07 16:00:00	2016-07-01	16:00:00	30.621	2016	7	26
2016-01-07 17:00:00	2016-07-01	17:00:00	30.596	2016	7	26
2016-01-07 18:00:00	2016-07-01	18:00:00	30.444	2016	7	26
2016-01-07 19:00:00	2016-07-01	19:00:00	30.394	2016	7	26
2016-01-07 20:00:00	2016-07-01	20:00:00	30.419	2016	7	26
2016-01-07 21:00:00	2016-07-01	21:00:00	30.369	2016	7	26
2016-01-07 22:00:00	2016-07-01	22:00:00	30.217	2016	7	26
2016-01-07 23:00:00	2016-07-01	23:00:00	30.066	2016	7	26
2016-02-07	2016-07-02	00:00:00	29.941	2016	7	26
2016-02-07 01:00:00	2016-07-02	01:00:00	29.84	2016	7	26
2016-02-07 02:00:00	2016-07-02	02:00:00	29.74	2016	7	26
2016-02-07 03:00:00	2016-07-02	03:00:00	29.665	2016	7	26
2016-02-07 04:00:00	2016-07-02	04:00:00	29.665	2016	7	26
2016-02-07 05:00:00	2016-07-02	05:00:00	29.59	2016	7	26
2016-02-07 06:00:00	2016-07-02	06:00:00	29.414	2016	7	26
2016-02-07 07:00:00	2016-07-02	07:00:00	29.464	2016	7	26
2016-02-07 08:00:00	2016-07-02	08:00:00	29.54	2016	7	26
2016-02-07 09:00:00	2016-07-02	09:00:00	29.69	2016	7	26
2016-02-07 10:00:00	2016-07-02	10:00:00	30.091	2016	7	26
2016-02-07 11:00:00	2016-07-02	11:00:00	30.697	2016	7	26
2016-02-07 12:00:00	2016-07-02	12:00:00	30.976	2016	7	26
2016-02-07 13:00:00	2016-07-02	13:00:00	31.026	2016	7	26
2016-02-07 14:00:00	2016-07-02	14:00:00	31.077	2016	7	26
2016-02-07 15:00:00	2016-07-02	15:00:00	30.748	2016	7	26
2016-02-07 16:00:00	2016-07-02	16:00:00	30.444	2016	7	26
2016-02-07 17:00:00	2016-07-02	17:00:00	30.066	2016	7	26
2016-02-07 18:00:00	2016-07-02	18:00:00	29.941	2016	7	26
2016-02-07 19:00:00	2016-07-02	19:00:00	30.091	2016	7	26
2016-02-07 20:00:00	2016-07-02	20:00:00	30.091	2016	7	26
2016-02-07 21:00:00	2016-07-02	21:00:00	30.016	2016	7	26
2016-02-07 22:00:00	2016-07-02	22:00:00	29.941	2016	7	26
2016-02-07 23:00:00	2016-07-02	23:00:00	29.865	2016	7	26
2016-03-07	2016-07-03	00:00:00	29.715	2016	7	27
2016-03-07 01:00:00	2016-07-03	01:00:00	29.665	2016	7	27
2016-03-07 02:00:00	2016-07-03	02:00:00	29.59	2016	7	27
2016-03-07 03:00:00	2016-07-03	03:00:00	29.615	2016	7	27
2016-03-07 04:00:00	2016-07-03	04:00:00	29.59	2016	7	27
2016-03-07 05:00:00	2016-07-03	05:00:00	29.615	2016	7	27
2016-03-07 06:00:00	2016-07-03	06:00:00	29.59	2016	7	27
2016-03-07 07:00:00	2016-07-03	07:00:00	29.59	2016	7	27
2016-03-07 08:00:00	2016-07-03	08:00:00	29.64	2016	7	27
2016-03-07 09:00:00	2016-07-03	09:00:00	29.74	2016	7	27
2016-03-07 10:00:00	2016-07-03	10:00:00	29.966	2016	7	27
2016-03-07 11:00:00	2016-07-03	11:00:00	30.571	2016	7	27
2016-03-07 12:00:00	2016-07-03	12:00:00	31.128	2016	7	27
2016-03-07 13:00:00	2016-07-03	13:00:00	31.255	2016	7	27
2016-03-07 14:00:00	2016-07-03	14:00:00	31.357	2016	7	27
2016-03-07 15:00:00	2016-07-03	15:00:00	31.433	2016	7	27
2016-03-07 16:00:00	2016-07-03	16:00:00	31.026	2016	7	27
2016-03-07 17:00:00	2016-07-03	17:00:00	30.874	2016	7	27
2016-03-07 18:00:00	2016-07-03	18:00:00	30.419	2016	7	27
2016-03-07 19:00:00	2016-07-03	19:00:00	30.167	2016	7	27
2016-03-07 20:00:00	2016-07-03	20:00:00	30.167	2016	7	27
2016-03-07 21:00:00	2016-07-03	21:00:00	30.117	2016	7	27
2016-03-07 22:00:00	2016-07-03	22:00:00	30.217	2016	7	27
2016-03-07 23:00:00	2016-07-03	23:00:00	30.369	2016	7	27
2016-04-07	2016-07-04	00:00:00	30.268	2016	7	27
2016-04-07 01:00:00	2016-07-04	01:00:00	30.142	2016	7	27
2016-04-07 02:00:00	2016-07-04	02:00:00	30.066	2016	7	27
2016-04-07 03:00:00	2016-07-04	03:00:00	29.916	2016	7	27
2016-04-07 04:00:00	2016-07-04	04:00:00	29.815	2016	7	27
2016-04-07 05:00:00	2016-07-04	05:00:00	29.74	2016	7	27
2016-04-07 06:00:00	2016-07-04	06:00:00	29.715	2016	7	27
2016-04-07 07:00:00	2016-07-04	07:00:00	29.765	2016	7	27
2016-04-07 08:00:00	2016-07-04	08:00:00	29.815	2016	7	27
2016-04-07 09:00:00	2016-07-04	09:00:00	29.991	2016	7	27
2016-04-07 10:00:00	2016-07-04	10:00:00	30.268	2016	7	27
2016-04-07 11:00:00	2016-07-04	11:00:00	30.748	2016	7	27
2016-04-07 12:00:00	2016-07-04	12:00:00	31.535	2016	7	27
2016-04-07 13:00:00	2016-07-04	13:00:00	32.227	2016	7	27
2016-04-07 14:00:00	2016-07-04	14:00:00	32.433	2016	7	27
2016-04-07 15:00:00	2016-07-04	15:00:00	31.842	2016	7	27
2016-04-07 16:00:00	2016-07-04	16:00:00	31.51	2016	7	27
2016-04-07 17:00:00	2016-07-04	17:00:00	30.798	2016	7	27
2016-04-07 18:00:00	2016-07-04	18:00:00	30.646	2016	7	27
2016-04-07 19:00:00	2016-07-04	19:00:00	30.394	2016	7	27
2016-04-07 20:00:00	2016-07-04	20:00:00	30.217	2016	7	27
2016-04-07 21:00:00	2016-07-04	21:00:00	30.192	2016	7	27
2016-04-07 22:00:00	2016-07-04	22:00:00	30.268	2016	7	27
2016-04-07 23:00:00	2016-07-04	23:00:00	30.469	2016	7	27
2016-05-07	2016-07-05	00:00:00	30.419	2016	7	27
2016-05-07 01:00:00	2016-07-05	01:00:00	30.444	2016	7	27
2016-05-07 02:00:00	2016-07-05	02:00:00	30.419	2016	7	27
2016-05-07 03:00:00	2016-07-05	03:00:00	30.117	2016	7	27
2016-05-07 04:00:00	2016-07-05	04:00:00	30.041	2016	7	27
2016-05-07 05:00:00	2016-07-05	05:00:00	29.966	2016	7	27
2016-05-07 06:00:00	2016-07-05	06:00:00	29.966	2016	7	27
2016-05-07 07:00:00	2016-07-05	07:00:00	29.89	2016	7	27
2016-05-07 08:00:00	2016-07-05	08:00:00	29.991	2016	7	27
2016-05-07 09:00:00	2016-07-05	09:00:00	30.066	2016	7	27
2016-05-07 10:00:00	2016-07-05	10:00:00	30.293	2016	7	27
2016-05-07 11:00:00	2016-07-05	11:00:00	30.621	2016	7	27
2016-05-07 12:00:00	2016-07-05	12:00:00	31.357	2016	7	27
2016-05-07 13:00:00	2016-07-05	13:00:00	31.689	2016	7	27
2016-05-07 14:00:00	2016-07-05	14:00:00	31.893	2016	7	27
2016-05-07 15:00:00	2016-07-05	15:00:00	31.919	2016	7	27
2016-05-07 16:00:00	2016-07-05	16:00:00	31.97	2016	7	27
2016-05-07 17:00:00	2016-07-05	17:00:00	31.103	2016	7	27
2016-05-07 18:00:00	2016-07-05	18:00:00	30.343	2016	7	27
2016-05-07 19:00:00	2016-07-05	19:00:00	30.545	2016	7	27
2016-05-07 20:00:00	2016-07-05	20:00:00	30.318	2016	7	27
2016-05-07 21:00:00	2016-07-05	21:00:00	30.243	2016	7	27
2016-05-07 22:00:00	2016-07-05	22:00:00	30.268	2016	7	27
2016-05-07 23:00:00	2016-07-05	23:00:00	30.293	2016	7	27
2016-06-07	2016-07-06	00:00:00	30.192	2016	7	27
2016-06-07 01:00:00	2016-07-06	01:00:00	30.142	2016	7	27
2016-06-07 02:00:00	2016-07-06	02:00:00	30.041	2016	7	27
2016-06-07 03:00:00	2016-07-06	03:00:00	29.941	2016	7	27
2016-06-07 04:00:00	2016-07-06	04:00:00	29.865	2016	7	27
2016-06-07 05:00:00	2016-07-06	05:00:00	29.865	2016	7	27
2016-06-07 06:00:00	2016-07-06	06:00:00	29.865	2016	7	27
2016-06-07 07:00:00	2016-07-06	07:00:00	29.84	2016	7	27
2016-06-07 08:00:00	2016-07-06	08:00:00	29.865	2016	7	27
2016-06-07 09:00:00	2016-07-06	09:00:00	29.966	2016	7	27
2016-06-07 10:00:00	2016-07-06	10:00:00	30.091	2016	7	27
2016-06-07 11:00:00	2016-07-06	11:00:00	30.369	2016	7	27
2016-06-07 12:00:00	2016-07-06	12:00:00	30.646	2016	7	27
2016-06-07 13:00:00	2016-07-06	13:00:00	31.103	2016	7	27
2016-06-07 14:00:00	2016-07-06	14:00:00	31.484	2016	7	27
2016-06-07 15:00:00	2016-07-06	15:00:00	31.842	2016	7	27
2016-06-07 16:00:00	2016-07-06	16:00:00	31.459	2016	7	27
2016-06-07 17:00:00	2016-07-06	17:00:00	31.153	2016	7	27
[truncated: 13,039 more rows]
